# Supplementary material for: Analysis of Immune Signatures in Longitudinal Tumor Samples Yields Insight into Biomarkers of Response and Mechanisms of Resistance to Immune Checkpoint Blockade
Source: Oxford University Press journal article supplement (doi:10.1158/2159-8290.cd-15-1545), 2016-06-15
Supplement: 21598290cd151545-sup-160314_2_supp_0_f8k9tp.xlsx [file 21598290cd151545-sup-160314_2_supp_0_f8k9tp.xlsx]

## Sheet: Supplementary Table S1a
Supplementary Table S1a. Patient Cohort Clinical Summary
	Anti-CTLA-4 Responders		Anti-PD-1 Responders		Anti-PD-1 Progressors		All Patients
	(n=7)		(n=15)		(n=33)		(n=56)
Age at start of first immunotherapy
Mean	61		57		56		57
Range	47-82		27-86		28-84		27-86
Sex- no. of patients (%)
Female	5 (71)		4 (27)		10 (30)		19 (34)
Male	2 (29)		11 (73)		23 (70)		37 (66)
Disease Origin - no. of patients (%)
Acral	1 (14)		2 (13)		4 (12)		7 (12)
Cutaneous	5 (71)		9 (60)		24 (73)		39 (70)
Mucousal	0 (0)		1 (6)		0 (0)		1 (2)
Unknown Primary	1 (14)		3 (20)		5 (15)		9 (16)
Mutational Status - no. of patients (%)
BRAF	4 (50)		4 (22)		2 (7)		10 (22)
NRAS	1 (12)		5 (28)		10 (34)		16 (29)
CKIT	0		1 (5)		4 (14)		5 (9)
TP53	2 (25)		2 (11)		5 (26)		9 (16)
Lactate dehydrogenase level at start of therapy — no. of patients (%)
Normal (<618 IU/L)	2 (29)		11 (74)		1 (3)		15 (27)
Above Normal (> 618 IU/L)	4 (57)		2 (13)		25 (76)		31 (55)
Not Available	1 (14)		2 (13)		7 (21)		10 (18)
Previous Therapies (#)*
Mean	1		2		4		2
Range	0-4		0-7		0-9		0-9
Duration between anti-CTLA-4 and anti-PD-1 (Weeks)
Mean (sd)	NA		21.6		36.7		NA
Range	NA		0-86		0-165		NA
RECIST Response Classification
Progression of Disease	2 (29)		3 (20)		33 (100)		38 (68)
Stable Disease	0 (0)		3 (20)		0 (0)		3 (5)
Partial Response	5 (71)		7 (47)		0 (0)		12 (21)
Complete Response	0 (0)		2 (13)		0 (0)		2 (4)
*previous therapies are listed in supplemental table S1b

## Sheet: Supplementary Table S1b
Supplemental Table S1b: Patient clinical characteristics
					anti-CTLA-4					anti-PD-1
ID	Group (1=IR,2=INR,3=PDR,4=PDNR)	Sex	DOB	Age at treatment start	Treated (Y/N)	CR, PR, SD, PD	# of prior or concurrent therapies	Description of prior or concurrent therapies	Start Date	Treated (Y/N)	CR, PR, SD, PD	# of prior or concurrent therapies	Description of prior or concurrent therapies	Start Date	# of interim tx	description of interim	LDH @ Baseline (anti-PD-1)
1	4	F	1964-07-20	48	Y	PD	1	Biochemo	2013-06-26	Y	PD	3	Ipilimumab, biochemo, temodar	2014-05-07	1	Temodar	3743
2	4	M	1963-11-21	50	Y	PD	2	Trametinib, dabrafenib	2014-06-15	Y	PD	3	Trametibib, ipilimumab, dabrafenib	2014-10-17	1	Dabrafenib	398
3	4	F	1954-03-15	60	Y	PD	3	High dose IL-2, ribociclib, binimetinib	2014-04-11	Y	PD	4	Ipilimumab, high dose IL-2, ribociclib, binimetinib	2014-09-09	0	NA	457
4	4	M	1939-07-04	72	Y	PD	4	Biochemo, CVD, interferon, dacarbazine	2011-12-14	Y	PD	8	Ipilimumab, vemurafenib, dabrafenib, trametinib, biochemo, CVD, interferon, dacarbazine	2014-05-09	3	Vemurafenib, dabrafenib, trametinib	491
5	1	F	1965-07-01	47	Y	PR	3	CVD, interferon, dabrafenib	2013-02-27	N	NA	NA	NA	NA	NA	NA	713
6	3	M	1965-04-01	48	Y	PD	1	IL-2 (Adj)	2013-07-28	Y	PD*	2	Ipilimumab, IL-2 (adj)	2014-07-09	0	NA	472
7	3	M	1948-07-25	64	Y	PD	1	Temozolomide	2013-03-14	Y	PR	2	Ipilimumab, temozolomide	2013-05-29	0	NA	458
8	3	M	1959-12-01	54	Y	PD	1	High dose IL-2	2014-01-14	Y	CR	2	Ipilimumab, high dose IL-2	2014-05-29	0	NA	390
9	3	M	1954-05-03	58	Y	PD	2	Dasatinib, temodar	2013-01-22	Y	SD	4	Ipilimumab, dasatinib, temodar,decarbazine	2013-08-20	1	Decarbazine	512
10	1	F	1959-09-07	54	Y	PR	0	NA	2014-02-06	N	NA	NA	NA	NA	NA	NA	701
11	4	M	1931-02-10	82	Y	PD	3	TLR, gp100 vaccine, dacarbazine	2013-11-12	Y	PD	5	Ipilimumab, AMG 337, TLR, gp100 vaccine, dacarbazine	2014-05-29	1	AMG 337	500
12	1	M	1943-07-08	70	Y	PD*	2	Abraxane, carboplatin	2014-02-19	N	NA	NA	NA	NA	NA	NA	1091
13	4	M	1959-09-27	52	Y	PD	0	NA	07/01/2012	Y	PD	2	Ipilimumab, biochemo	2013-06-13	1	Biochemo	608
14	3	F	1947-07-17	66	Y	PD	1	Biochemo	2014-04-29	Y	PR	2	Ipilimumab, biochemo	2014-08-20	0	NA	496
•15	3	F	1970-02-24	43	N	NA	N/A	NA	NA	Y	PD*	0	NA	2013-03-22	0	NA	560
16	4	M	1979-06-03	34	Y	PD	0	NA	2013-11-22	Y	PD	2	Ipilimumab, high dose IL-2	2014-05-20	1	High dose IL-2	N/A
17	2	F	1956-01-31	58	Y	PD	0	NA	2014-02-15	N	NA	NA	NA	NA	NA	NA	433
18	4	F	1947-10-28	66	Y	PD	2	Doxycycline, temodar	2014-03-07	Y	PD	3	Ipilimumab, doxycycline, temodar	2014-07-03	0	NA	423
19	4	M	1958-02-11	55	Y	PD	3	Vaccine (adj), vemurafenib, trametinib	2013-05-18	Y	PD	8	Ipilimumab,TIC, cisplatin, BCNU, tamoxifen, Vaccine (adj), vemurafenib, trametinib	2013-11-05	4	TIC, cisplatin, BCNU, tamoxifen	N/A
20	4	M	1954-02-28	59	Y	PD	1	Dacarbazine	2014-02-19	Y	PD	2	Ipilimumab, dacarbazine	2014-06-02	0	NA	548
21	4	M	1950-07-24	63	Y	PD	0	NA	2013-11-13	Y	PD	1	Ipilimumab	2014-05-29	0	NA	N/A
22	1	F	1963-12-20	50	Y	PR	0	NA	2014-04-25	N	NA	NA	NA	NA	NA	NA	315
23	4	M	1973-12-21	40	Y	PD	0	NA	2014-06-19	Y	PD	1	Ipilimumab	2014-09-16	0	NA	465
24	3	M	1962-03-21	50	Y	PD	0	NA	2012-11-29	Y	SD	2	Ipilimumab, high dose IL-2	2014-06-09	1	High dose IL-2	N/A
25	4	F	1966-10-14	46	Y	PD	4	TLR, gp100 vaccine, high dose IL-2, temozolomide	2012-10-18	Y	PD	6	Ipilimumab, vemurafenib, carboplatin, paclitaxel, dabrafenib, trametinib	2014-05-23	5	Vemurafenib, carboplatin, paclitaxel, dabrafenib, trametinib	378
26	4	F	1952-09-26	60	Y	PD	1	IL-21+	2012-10-21	Y	PD	7	Ipilimumab, Interferon, IL-2, DCVax, ADI-PEG, cisplatin, IL-21+	2014-05-23	5	Interferon, IL-2, DCVax, ADI-PEG, cisplatin	472
27	1	F	1956-11-30	56	Y	PR	0	NA	2013-01-01	N	NA	NA	NA	NA	NA	NA	N/A
28	4	M	1958-05-09	55	Y	PD	2	Biochemo, dacarbazine	2014-02-27	Y	PD	4	Ipilimumab, GM-CSF subcutaneous injections, biochemo, dacarbazine	2014-05-20	1	GM-CSF subcutaneous injections	471
29	4	M	1979-04-27	34	Y	PD	7	High dose IL-2,cisplatin, velban, temodar, trametinib, vemurafenib, taxol	2013-06-18	Y	PD	9	Ipilimumab, dabrafenib, trametinib,High dose IL-2,cisplatin, velban, temodar, vemurafenib, taxol	2014-05-20	2	Dabrafenib, trametinib	401
30	4	M	1947-03-11	66	Y	PD	1	Dacarbazine	2014-01-15	Y	PD	2	Ipilimumab, dacarbazine	2014-04-15	0	NA	499
31	1	F	1940-06-27	71	Y	PD*	4	Dacarbazine, trametinib, trientine, carboplatin	2011-07-01	N	NA	NA	NA	NA	NA	NA	400
32	4	F	1928-12-28	84	Y	PD	0	NA	2013-09-30	Y	PD	1	Ipilimumab	2014-06-10	0	NA	463
33	4	F	1952-08-04	61	Y	PD	0	NA	2013-08-09	Y	PD	2	Ipilimumab, biochemo	2014-05-30	1	Biochemo	377
34	3	M	1944-02-14	69	Y	PD	1	Temodar, temodar	2013-08-02	Y	PR	2	Ipilimumab, temodar	2014-06-05	0	NA	454
35	3	F	1964-08-19	49	Y	PD	0	NA	2014-03-12	Y	CR	1	Ipilimumab	2014-06-05	0	NA	412
36	4	M	1957-01-30	56	Y	PD	1	Gleevec	2013-10-04	Y	PD	4	Ipilimumab,temodar, abraxane, gleevec	2014-06-18	2	Temodar, abraxane	N/A
37	1	M	1932-01-20	82	Y	PR	1	Dacarbazine	2014-05-21	N	NA	NA	NA	NA	NA	NA	894
38	4	F	1959-04-18	53	Y	PD	0	NA	2012-07-19	Y	PD	2	Ipilimumab, TIL	2014-05-29	1	TIL	548
39	4	M	1957-08-03	55	Y	PD	1	Abraxane	2013-02-12	Y	PD	4	Ipilimumab, dabrafenib, trametinib, abraxane	2013-08-05	2	Dabfrafenib, trametinib	400
40	4	M	1958-05-16	53	Y	PD	1	Biochemo	2011-10-03	Y	PD	5	Ipilimumab, high dose IL-2, dabrafenib, trametinib, biochemo	2014-05-09	3	High dose IL-2, dabrafenib, trametinib	N/A
41	4	M	1945-04-26	68	Y	PD	3	Cisplatin, velban, dacarbazine	2013-05-01	Y	PD	6	Ipilimumab, Cisplatin, velban, dacarbazine, carboplatin, taxol	2013-12-01	2	Carboplatin, Taxol	436
42	4	F	1962-08-20	48	Y	PD	2	High dose IL-2 (adj), temodar	2010-08-23	Y	PD	6	Ipilimumab, TIL, dabrafenib, trametinib,High dose IL-2 (adj), temodar	2014-06-25	3	TIL, dabrafenib, trametinib	N/A
43	4	M	1951-10-27	61	Y	PD	2	Interferon (adj), Nivolumab	2013-06-19	Y	PD	2	Ipilimumab, Interferon (adj)	2013-10-31	0	NA	N/A
44	4	F	1951-08-09	62	Y	PD	0	NA	2014-02-08	Y	PD	1	Ipilimumab	2014-07-16	0	NA	306
45	4	M	1953-03-08	59	Y	PD	0	NA	6/1/2012	Y	PD	5	Ipilimumab, dabrafenib, abraxane, carboplatin, taxol	2014-07-30	4	Dabrafenib, abraxane, carboplatin, taxol	474
46	3	F	1986-11-26	27	Y	PD	3	Ecorafenib, binimetinib, dabrafenib	2014-03-30	Y	PR	4	Ipilimumab, ecorafenib, binimetinib, dabrafenib	2014-08-05	0	NA	832
47	3	M	1940-06-12	72	Y	PD	2	Temodar, doxycyline	2013-04-10	Y	PR	3	Ipilimumab,temodar, doxycyline	2014-08-13	0	NA	410
48	4	M	1944-07-24	68	Y	PD	2	Trametinib, dabrafenib	2013-06-29	Y	PD	3	Ipilimumab, trametinib, dabrafenib	2014-07-30	0	NA	588
49	4	M	1966-05-31	46	Y	PD	1	Temodar	2012-06-25	Y	PD	4	Ipilimumab, carboplatin, taxol, temodar	2014-07-16	1	Carboplatin, Taxol	546
50	4	M	1943-01-09	68	Y	PD	0	NA	2011-12-14	Y	PD	4	Ipilimumab, vemurafenib, dabrafenib, trametinib	2014-08-14	3	Vemurafenib, dabrafenib, trametinib	491
51	3	M	1975-05-02	37	Y	PD	1	TIL	2012-10-01	Y	PD*	2	Ipilimumab, TIL	4/1/2013	0	NA	N/A
52	3	M	1947-11-01	65	Y	PD	5	Cisplatin, Velban, dacarbazine, interferon, vemurafenib	2013-10-24	Y	SD	7	Ipilimumab, cisplatin, Velban, dacarbazine, interferon, vemurafenib, DCVax	2015-08-08	1	DCVax	334
53	4	M	1960-01-13	54	Y	PD	5	MAGE, high dose IL-2, cisplatin, vinblastine, dacarbazine	2014-06-18	Y	PD	6	Ipilimumab, MAGE, high dose IL-2, cisplatin, vinblastine, dacarbazine	2014-09-12	0	NA	358
54	4	M	1985-05-16	28	Y	PD	2	Interferon (adj), temodar	2013-11-07	Y	PD	3	Ipilimumab, Interferon (adj), temodar	2014-09-09	0	NA	325
•55	3	M	1929-03-14	86	N	NA	NA	NA	NA	Y	PR	0	NA	2015-04-06	0	NA	627
56	3	M	1943-05-30	69	Y	PD	1	Temozolomide	2012-09-01	Y	PR	2	Ipilimumab,temozolomide	2012-09-01	0	NA	463
•57	4	M	1931-07-27	84	N	NA	NA	NA	NA	Y	PD	0	NA	2015-09-20	NA	NA	426
•58	4	M	1948-09-21	67	N	NA	NA	NA	NA	Y	NA	0	NA	2015-09-29	NA	NA	408
•59	3	M	1970-11-12	44	N	NA	NA	NA	NA	Y	PR	0	NA	2015-10-05	NA	NA	487
•60	3	M	1944-05-18	71	N	NA	NA	NA	NA	Y	PR	3	Biochemotherapy, M-Vax trial, Mel44 Vaccine trial	2015-11-09	NA	NA	526
•61	3	M	1934-07-09	81	N	NA	NA	NA	NA	Y	SD	0	NA	2015-10-07	NA	NA	477
•62	3	M	1929-03-27	86	N	NA	NA	NA	NA	Y	CR (LN)	0	NA	2015-11-11	NA	NA	405
•63	3	M	1934-05-17	81	N	NA	NA	NA	NA	Y	SD	0	NA	2015-12-02	NA	NA	654
•64	3	M	1945-06-21	69	N	NA	NA	NA	NA	Y	PR	1	PEG IL-10	2015-03-15	NA	NA	496
•65	4	M	1946-10-18	69	N	NA	NA	NA	NA	Y	PD	1	Neoadj. Nivolumab	2016-01-19	NA	NA	311
•66	3	F	1961-05-07	53	N	NA	NA	NA	NA	Y	NA	0	NA	2015-02-27	NA	NA	421
•67	3	M	1956-11-18	58	N	NA	NA	NA	NA	Y	CR	1	Adj. Interferon	2015-08-08	NA	NA	360
•68	4	M	1958-09-04	56	N	NA	NA	NA	NA	Y	PD	1	Neoadj. dabrafenib, trametinib	2015-08-08	NA	NA	461
•69	3	M	1992-01-29	23	N	NA	NA	NA	NA	Y	PR	0	NA	2015-07-31	NA	NA	433
•70	3	M	1960-06-03	55	N	NA	NA	NA	NA	Y	CR	0	NA	2015-12-14	NA	NA	399
*patient with clinical benefit at 6 months after treatment

## Sheet: Supplementary Table S1c
Supplementary Table S1c: Immune profiling by IHC sample log
Patient ID	anti-CTLA-4			anti-PD-1
	Pre	On	Pro	Pre	On	Pro
1	1	1	0	0	1	0			No sample profiled
2	1	0	1	1	0	1			Sample profiled
3	0	0	1	1	0	0			Not applicable
4	0	0	1	1	1	0
5	1	0	NA	NA	NA	NA
6	0	1	1	1	0	NA
7	1	0	0	0	0	NA
8	1	0	1	1	0	NA
10	1	0	NA	NA	NA	NA
12	1	0	NA	NA	NA	NA
13	0	0	0	0	0	1
14	1	0	0	0	0	NA
•15	NA	NA	NA	1	0	NA
16	0	0	1	1	1	0
17	0	1	0	NA	NA	NA
18	1	0	0	0	0	0
19	1	0	0	0	1	1
20	1	0	0	0	0	1
21	0	0	1	1	0	0
22	1	1	NA	NA	NA	NA
23	1	0	0	0	0	0
24	0	0	1	1	1	NA
25	1	0	1	1	0	0
26	1	0	1	1	0	1
27	0	1	NA	NA	NA	NA
28	1	0	0	0	1	0
29	0	0	1	1	0	0
30	1	0	0	0	0	0
31	1	0	NA	NA	NA	NA
32	1	0	0	0	0	0
33	1	0	1	1	0	0
34	1	0	0	0	0	NA
35	1	0	0	0	0	NA
38	0	0	1	1	0	0
39	1	0	0	0	0	0
40	1	0	1	1	0	0
41	1	0	0	0	0	0
42	1	0	1	1	0	1
43	1	0	0	0	0	1
44	1	0	0	0	0	0
45	1	0	1	1	0	1
47	1	0	0	0	1	NA
49	0	0	1	1	0	1
50	1	0	1	1	0	1
51	1	0	0	0	0	NA
52	1	0	1	1	1	NA
53	1	0	0	0	1	0
54	1	0	1	1	0	0
•55	NA	NA	NA	1	1	NA
•56	1	0	1	1	1	NA
•58	NA	NA	NA	1
•59	NA	NA	NA	1		NA
•60	NA	NA	NA	1		NA
•61	NA	NA	NA	1		NA
•63	NA	NA	NA	1		NA
•64	NA	NA	NA		1	NA
•65	NA	NA	NA	1	1
•67	NA	NA	NA	1		NA
•68	NA	NA	NA		1
•= CTLA-4 blockade naïve patients

## Sheet: Supplementary Table S1d
Supplementary Table S1d: Nanostring 54 sample log
Patient ID	anti-CTLA-4			anti-PD-1
	Pre	On	Pro	Pre	On	Pro
1	0	0	0	0	1	0			No sample profiled
2	0	0	1	1	0	1			Sample profiled
3	0	0	1	1	1	0			Not available
4	0	0	1	1	1	0
5	1	0	NA	NA	NA	NA
6	0	1	1	1	0	NA
7	1	0	0	0	1	NA
8	1	0	1	1	0	NA
9	1	0	1	1	1	NA
10	1	0	NA	NA	NA	NA
•15	NA	NA	NA	1	0	NA
16	0	0	1	1	1	0
18	1	1	1	1	0	0
19	1	0	0	0	1	1
22	1	1	NA	NA	NA	NA
23	1	0	0	0	0	0
24	0	0	1	1	1	NA
25	1	0	1	1	0	0
26	0	0	0	0	0	1
27	0	1	NA	NA	NA	NA
31	1	0	NA	NA	NA	NA
37	1	1	NA	NA	NA	NA
40	0	0	0	0	1	0
42	1	0	0	0	0	0
43	1	0	0	0	0	1
45	0	0	0	0	0	1
47	1	0	0	0	1	NA
49	0	0	1	1	0	1
50	1	0	1	1	0	1
52	0	0	1	1	0	NA
54	0	0	1	1	0	0
•= CTLA-4 blockade naïve patients

## Sheet: Supplementary Table S2
Supplementary Table S2: Summary of immune profiling by immunohistochemistry																																													Supplementary Table S2: Summary of immune profiling by immunohistochemistry
Pt ID	Timepoint	anti-CTLA-4 response	anti-PD-1 response	Biopsy Site	CD3	CD4	CD8	CD20	CD45RO	CD57	CD68	FoxP3	Gr-B	PD-1	PD-L1	LAG-3	CD8 Margin
					Density CT	Density CT	Density CT	Density CT	Density CT	Density CT	Density CT	Density CT	Density CT	Density CT	H-Score	Density CT	Density CT
1	Pre-aCTLA4	NR	NR	Liver	639.636	66.9635	296.342	239.5	156.5	156.5		52	70.5	66.9905	42.2496	50.5	N/A*
2	Pre-aCTLA4	NR	NR	Iliac LN	489	241.605	572.339	205.532	376.877	537.224	4034.31	356.027	443.2	650.219	41.1342	395.43	N/A*
5	Pre-aCTLA4	R	N/A	Parotid	419.982	102.659	266.006	12.6046	474.693	323.504	1830.68	78.1666	136.512	91.1942	8.08905	95.1788	174.643
7	Pre-aCTLA4	NR	R	Leg	1533.53	523.036	981.085	749.496	1460.92	1070.94	1918.32	733.954	829.004	1189.2	140.53	663.296	1621.49
8	Pre-aCTLA4	NR	R	Scalp	284.665	94.3299	66.0078	55.1488	311.799	40.0236	1053.16	35.761	12.527	51	17.7317	77.3684	179.922
10	Pre-aCTLA4	R	N/A	Axillary skin	141.247	231.566	261.651	27.1784	1012.84	136.336	1180.13	80.4591	79.743	217.652	14.0781	569.089	424.378
12	Pre-aCTLA4	R	N/A	Back	340	189.823	227.739	90.5	408.5	44.5	1746	80.3373	143.036	294.948	21.7403	181.047	669.351
14	Pre-aCTLA4	NR	R	Axillary LN	2105.29	804.724	803.416	615.735	1222.84	235.873	2344.02	280.806	292.929	1182.77	27.4889	741.63	N/A*
18	Pre-aCTLA4	NR	NR	Groin skin		165.407	149.021	55.5551	195.076	298.307	1310.66	57.8331	81.0145	842.293	46.2925		265.509
19	Pre-aCTLA4	NR	NR	Axillary LN	725.116	22.4316	625.798	26.1532	540.058	540.058	1893.24	125.846	740.584	848.327	49.5875	232.56	N/A*
20	Pre-aCTLA4	NR	NR	Lung	923.909	187.907	507.48	703.038	391.797	73.2428	2487.7	126.473	411.253	757.385	16.5003	349.605	1663.47
22	Pre-aCTLA4	R	N/A	Axillary LN	347.583	21.7057	114.484	428.889	669.038	658.396	1072.82	97.5416	55.0559	84.3427	23.104	121.076	N/A*
23	Pre-aCTLA4	NR	NR	Foot	424.684	192.518	301.38	15.2883	421.582	60.5051	3151.23	51.1987	60.0698	121.686	51.2813	91.0455	1068.49
25	Pre-aCTLA4	NR	NR	Chest	1120.34	401.89	1257.22	99.6585	771.46	125.419	3832.8	2030.42	580.506	1184.16	163.309	681.537	2599.54
26	Pre-aCTLA4	NR	NR	Lung	159.615	80.67	182.605	92.1346	84.33			20	36.5	106.214	23.7718	459	N/A*
28	Pre-aCTLA4	NR	NR	Scalp	299	87.2855	65.8217	11	179.67	19.5	2535.09	28.7298	45.0205	49.444	2.46187	114.232	243.114
30	Pre-aCTLA4	NR	NR	Retroperitoneal		542.519	114.046				1669.47	380.872	24.8156	214.047	0.82646	269.208	N/A*
31	Pre-aCTLA4	R	N/A	Lung	530.393	281.725	582.223	264.118	395.124	75.5393	1048.45	330.708	201.063	544.738	5.50971	256.523	N/A*
32	Pre-aCTLA4	NR	NR	Heel	161.423		254.149	222.401	332.586	298.956	1149.36	112.407	115.713	196.918	6.6719	189.041	987.619
33	Pre-aCTLA4	NR	NR	Axillary LN	2343.48	879.149	206.333			0	2435.57	732.596	328.41	168.708	12.4745	106.459	233.596
34	Pre-aCTLA4	NR	R	Mandible	536	319.698	140.988	490.798	712.502	270.5	1480	317.5	441.33	591	51.1989	347.67	983.792
35	Pre-aCTLA4	NR	R	Lung	920.159	227.997	626.476	225.718	712.576		1778.79	311.857	168.734	234.558	66.6158	599.003	N/A*
39	Pre-aCTLA4	NR	NR	Axillary LN	737.356	0	291.496	1486.18	279.276	86.2179		404.597	124.066	105.629	12.37		307.247
40	Pre-aCTLA4	NR	NR	Foot	180.673	41.6772	146.873	160.388	61.2557	28.3063	840.158	50.4843	50.5172	25.9165	4.16758	122.584	N/A*
41	Pre-aCTLA4	NR	NR	Duodenum	796.926	221.218	254.426	301.6	1026.05	1355.34	2484.47	244.265	90.4064	161.195	4.64845	262.794	N/A*
42	Pre-aCTLA4	NR	NR	Iliac LN	688.478	264.048	488.204	486.541	1150.49	134.082	1766.62	224.973	29.9677	133.394	30.493	76.9231	N/A*
43	Pre-aCTLA4	NR	NR	Abd wall	1885.72	532.5	340.5	277	225.058	522.093	635.414	527.491	44.6944	1645.75	32.0638	2976.07	466.879
44	Pre-aCTLA4	NR	NR	Lung	157.24	176.242	378.025				3989.36	929.819	144.33	293.145	36.3495	326	N/A*
45	Pre-aCTLA4	NR	NR	Abdomen	193.99	34.2232	187.835	201.558	1458.52	184.686	948.369	335.172	126.638	90.4988	39.7533	32.9652	N/A*
47	Pre-aCTLA4	NR	R	Shoulder	108.135	18.7008	31.3763	56.6775	162.902	23.6616	2348.35	23.7713		100.551	22.2646	48.7221	155.199
50	Pre-aCTLA4	NR	NR	Inguinal LN	178.325	45.6854		47.996	489.604	150.441	1107.21	89.4991		196.495	18.1276		N/A*
51	Pre-aCTLA4	NR	R	Small bowel	75.3387	65.6106	69.2486	33.5469	53.4673	453.168	462.589	10.3065	33.7303	34.9301	1.14037	310.177	415.632
52	Pre-aCTLA4	NR	R	Neck LN	2995.3	236.67	2186.67	1150.1	1369.08	427.194	1250.63	1149.5	187.5	1814.67	26.3075	624	N/A
53	Pre-aCTLA4	NR	NR	Iliac LN	596.651	19.3454	398.424	15.6886	356.707	51.6879	1347.98	131.429	62.1035	193.586	39.9707	180.711	433
54	Pre-aCTLA4	NR	NR	Brain	90.0384	45.682	68.5837	8.66561	127.215	59.7325	1246.32	28.0345	77.8982	70.2784	13.3787	66.9953	N/A*
56	Pre-aCTLA4	NR	R	Lung		17.3867	419.866							136.477	3		N/A*
1	on aCTLA4	NR	NR	Stomach	962.8	0	56	0	1195	62	790	69	0	53	2	0	N/A*
6	on aCTLA4	NR	R	Abdomen	411.341	156.663	276.542	61.7086	287.046	72.6087	1882.73	167.211	118.555	164.928	14.4121	401.458	1454
17	on aCTLA4	NR	N/A	Back	2230.2	839	155	60	3624	73	3559	96	158	427	79	333	N/A*
22	on aCTLA4	R	N/A	Axillary LN	567.564	475.753	728.661	48.8592		32.9672	2258.61	109.63	429.131	88.5654	152.404	274.867	N/A*
27	on aCTLA4	R	N/A	Spleen	1378.78	787.103	456.92	2016.12	1784.32	688.399	1719.14	275.455	1720.7	684.949	88.6562	778.324	N/A*
2	Prog aCTLA4 / Pre aPD1	NR	NR	Neck	2663.72	1326.33	1088.45	193.216		125.919	4592.2	670.433	603.432	2266.2	53.6735		N/A*
3	Prog aCTLA4 / Pre aPD1	NR	NR	Leg	405	457.08	275.806	59.8378	1813.71	86.5	4269.42	34.4796	345.834	266.294	45.3726	244.293	N/A*
4	Prog aCTLA4 / Pre aPD1	NR	NR	Chest	749.585	343.325	46.1712	16.8003	802.725	69.18	3461.29	197.178	48.1309	49.9056	11.3082	128.126	29.3189
6	Prog aCTLA4 / Pre aPD1	NR	R	Back	110.047	186.846	88.9872	23.4945	1113.33	17.0008	558.942	31.5999	51.2147	21.5857	40.3541	612.55	314.429
8	Prog aCTLA4 / Pre aPD1	NR	R	Scalp	4380.43	881.167	4086.67	526.5	2249.5	424.5	5200	407.5	940.5	2261.86	81		N/A*
•15	Pre aPD1	N/A	R	Scalp	259.903	477.612	479.211	172.078	769.276	202.503	1449.16	148.249	193.082	105.815	4.57295	248.234	1258.78
16	Prog aCTLA4 / Pre aPD1	NR	NR	Axillary LN	298	289.131	351.005				2270.15	107.167	95.6633	318.587	29.7487	332.172	1841.9
16	Prog aCTLA4 / Pre aPD1	NR	NR	Abdomen	420.974	184.528	343.177	6.698	271.946	16.8259	843.701	8.50716	80.6259	229.906	33.4391	188.238	N/A*
21	Prog aCTLA4 / Pre aPD1	NR	NR	Neck	400.547	102.501	497.129	18.8388	1173.58	44.2846	1387.57	43.3435	634.935	92.9783	139.252	491.554	1319
24	Prog aCTLA4 / Pre aPD1	NR	R	Arm	3483.72	1368.1	1821.64		1614.55	64.3924	5257.81	511.952	1130.81	2465.7	24.0155	541.502	N/A*
25	Prog aCTLA4 / Pre aPD1	NR	NR	Breast	96.2074	35.6781	54.5267	20.4317	123.258	48.5837	1776.61	72.5887	31.9381	29.9096	7.31431	61.3012	315
26	Prog aCTLA4 / Pre aPD1	NR	NR	Pelvis	152.536	143.68	357.049	156.5	168.5	66.5	1161.26	199.405	187.503	289.216	16.638	135.786	N/A*
29	Prog aCTLA4 / Pre aPD1	NR	NR	Liver	462.9	442.212	305.061	107.019	1343.7	185.279	1388.23	90.0423	37.3001	36.168	19.0299	61.047	N/A*
33	Prog aCTLA4 / Pre aPD1	NR	NR	Abdomen	406.902	425.077	376.919	579.882	1751.33	78.6541	1436	65.3208	55.3696	77.7021	10.2619	140.232	N/A*
38	Prog aCTLA4 / Pre aPD1	NR	NR	Liver	1572.86	345.701	1230.72	398.775	1736.73	471.623	3918.84	287.716	699.563	1005.78	66.7713	558.751	1232.66
40	Prog aCTLA4 / Pre aPD1	NR	NR	Iliac LN	2275.34	767.347	1693.52	801.245	1518.75	153.342	4541.16	364.256	1067.37	727.251	110.746	1281.87	N/A*
42	Prog aCTLA4 / Pre aPD1	NR	NR	Leg	181.83	77.7829	346.109	77.3298	252.674	122.876	1142.31	136.803	620	112.449	26.2932	1021.87	439.662
45	Prog aCTLA4 / Pre aPD1	NR	NR	Scalp	164.466	229.618	67.5461	139.272	587.305	480.384	3195.75	137.371	177.676	718.278	24.1145	153.689	147
49	Prog aCTLA4 / Pre aPD1	NR	NR	Brain	438.423	195.598	337.45	92.2596	717.251	152.703	1076.9	57.066	113.933	234.318	23.16	184.24	N/A*
50	Prog aCTLA4 / Pre aPD1	NR	NR	Adrenal gland	2356.83	339.031	2275.83	680.708	1417.27	703.215	2479.2	111.296	132.632	958.365	74.9399	1373.6	N/A*
52	Prog aCTLA4 / Pre aPD1	NR	R	Neck	2922.03	1436.93	1437.35	1476.39	4170.18	726.601	3728.41	328.447	1108.35	2319.53	78.2302	1153.25	N/A*
54	Prog aCTLA4 / Pre aPD1	NR	NR	Brain	920.61	293.808	997.914	509.82	838.142	238.343	1761.86	296.229	598.744	873.843	89	782.597	346.223
•55	Pre aPD1	N/A	R	Back	1363.38	344.976	1495.67	36.4966	2064.59	56.7106	2849.01	96.9468	501.688	673.007	74.992	788.705	N/A*
56	Prog aCTLA4 / Pre aPD1	NR	R	Lung		20.2592	1364.51						139.33	29.088	13.9136	20.8267	N/A*
1	On aPD1	NR	NR	Abdomen	84.4259	53.2855	73.5089	15.9661	853.51	34.9936	1061.19	16.495	65.4214	40.9092	5.78901	27.5051	N/A*
4	On aPD1	NR	NR	Arm/shoulder	96.9049	176.954	48.1416	4.87569	401.766	139.672	2117.41	25.9021	41.0713	27.8391	15.3599	530.757	N/A*
16	On aPD1	NR	NR	Axillary mass	494.249	283.619	481.969	8.65873	555.046	19.4435	1899.56	189.924	374.626	203.05	29.9544	351.624	N/A*
19	On aPD1	NR	NR	Chest	117.266	56.5052	83.2821	12.7407	128.636	67.9823	1522.45	52.5559	15.4757	49.5792	1.90729	38.3527	232.827
24	On aPD1	NR	R	Arm	4793.3	703.431	3393.81	321.718	1651.03	438.708	3545.05	445.709	475.471	588.438	48.3501	2115.53	N/A*
28	On aPD1	NR	NR	Chest	837.417	321.571	410.249	20.6188	1388.7	78.7604	3454.09	82.2298	121.335	416.161	52.5696	182.313	1400.57
47	On aPD1	NR	R	Neck	2893	750.152	2691.81	590.06	4708.64	189.283	3711.96	350.817	1125.53	1876.8	130.449	2030.02	N/A*
52	On aPD1	NR	R	Neck	1937.15	835.348	1163.43	28.598	3217.09	394.854		195.429	1083.68	1232.51	77.908	1340.57	1176
53	On aPD1	NR	NR	Brain	576.393	124.072	493.425	14.2691	901.974	157.74	2807.05	53.3175	160.709	279.909	9.92388	452.984	N/A*
•55	On aPD1	N/A	R	Back	5181.55	480.887	4946.81	49.3034	3795.49	726.909	5293.83	456.927	2490.07	1063.86	42.1896	1769.52	N/A*
56	On aPD1	NR	R	Lung	2455.87	1365.87	2568.65	110	2536.56	310.771	1967.68	352.483	330.592	2045.5	92.4612	1188.08	1933.34
2	Prog aPD1	NR	NR	Shoulder	701.539	293.431	755.64	68.5955	1219.6	58.9478	5051.62	245.3	213.663	493.314	30.6658	246.986	N/A*
13	Prog aPD1	NR	NR	Brain	469.185	236.842	593.282	9.83749	522.078	296.769	1158.16	25.9924	238.183	243.202	23.8282	451.057	N/A*
13	Prog aPD1	NR	NR	Jejunum	191.382	113.096	189.73	19.3021	264.079	25.6836	674.064	26.5507	58.2446	105.992	37.0437	131.859	466.413
19	Prog aPD1	NR	NR	Shoulder	64.2918	103.594	89.6616	26.6888	194.316	60.1337	1521.13	605.701	160.745	224.186	12.7239	209.287	528.168
20	Prog aPD1	NR	NR	Liver	1270.3	532.313	783.083	588.023	2074.29	258.88	2672.19	220.035	731.662	758.993	107.905	900.673	N/A*
26	Prog aPD1	NR	NR	Thigh	994.876	587.675	911.478	14.1179	1287.24	61.8145	2819.85	102.644	705.646	934.066	105.092	705.508	N/A*
42	Prog aPD1	NR	NR	Abdomen	150	252.575	130.03	79.5	456	277.5	1596.05	42.9063	40.9217	34.6901	2.50776	135.899	156.518
43	Prog aPD1	NR	NR	Abdomen	14.9253	24.675	15.4148	15.9431	33.5942	51.813	1085.21	4.96579	15.2087	5.26431	0.54398	21.6968	190
43	Prog aPD1	NR	NR	Abd wall	174.483	36.6268	24.2749	55.193	230.564	26.8966	1401.85	13.0688	43.6591	22.872	5.95378	81.7825	248.738
45	Prog aPD1	NR	NR	Chest	866.918	400.819	410.105	46.577	770.579	64.9011	2480.93	77.5718	404.571	355.067	70.4014	408.012	N/A*
49	Prog aPD1	NR	NR	Omentum	426.247	38.8219	352.419	6.63049	219.727	43.204	1559.09	67.0896	74.8159	118.915	16.7894	103.418	1539.44
50	Prog aPD1	NR	NR	Flank	1525.1	524.231	1450.63	20.0349	1402.97	239.701	2617.1	154.964	921	1418.65	144.903	829.235	1829.33
N/A*= tissue specimen shows no evaluable or identifiable invasive tumor margin for CD8+ cell assessment, only tumor center is scored

## Sheet: Supplementary Table S3
Supplementary Table S3: Summary of immune profiling by 4 additional myeloid markers
Pt ID	Timepoint	anti-CTLA-4 response	anti-PD-1 response	CD14	CD33	CD163	CD206
				Density CT	Density CT	Density CT	Density CT
5	Pre-aCTLA4	R	N/A	121.695	105.209	409.347	175.773
31	Pre-aCTLA4	R	N/A	198.229	60.0323	394.646	121.029
2	Pre-aCTLA4	NR	NR	1023.34	2.88762	1005.29	318.201
8	Pre-aCTLA4	NR	R	348.068	46.755	208.921	373.062
18	Pre-aCTLA4	NR	NR	57.8702	21.6524	103.78	473.184
20	Pre-aCTLA4	NR	NR	205.126	16.1258	242.933	189.324
23	Pre-aCTLA4	NR	NR	853.703	150.465	452.462	208.342
25	Pre-aCTLA4	NR	NR	1099.26	30.5366	509.633	2611.62
28	Pre-aCTLA4	NR	NR	100.71	47.6117	413.439	270.9
32	Pre-aCTLA4	NR	NR	117.882	75.7511	416.571	874.751
34	Pre-aCTLA4	NR	R	770.222	21.3149	435.947	569.659
47	Pre-aCTLA4	NR	R	644.123	103.169	217.305	2055.02
50	Pre-aCTLA4	NR	NR	121.979	59.8272		758.412
53	Pre-aCTLA4	NR	NR	911.225	5.34765	585.93	442.019
17	on aCTLA4	NR	N/A	81.8649	64.6149	623.004	765.61
22	on aCTLA4	R	N/A	2084.28	1188.06	1387.66	442.449
15	Pre aPD1	N/A	R	50.3226	4.03633	106.551	95.0965
24	Prog aCTLA4 / Pre aPD1	NR	R	466.253	58.3041	226.901	886.898
52	Prog aCTLA4 / Pre aPD1	NR	R		300.71	1504.57	4183.83
6	Prog aCTLA4 / Pre aPD1	NR	R	3.724	9.19268	306.513	28.8834
2	Prog aCTLA4 / Pre aPD1	NR	NR		7.15121	564.38	2577.6
16	Prog aCTLA4 / Pre aPD1	NR	NR	113.435	106.284	355.916	15.2059
21	Prog aCTLA4 / Pre aPD1	NR	NR	222.182	3.63301	866.009	719.15
25	Prog aCTLA4 / Pre aPD1	NR	NR	219.475	6.13984	340.104	35.9899
29	Prog aCTLA4 / Pre aPD1	NR	NR	387.317	356.951	557.463	289.719
33	Prog aCTLA4 / Pre aPD1	NR	NR	2383.99	0.65216	669.444	1601.3
38	Prog aCTLA4 / Pre aPD1	NR	NR	316.428	94.9323	319.801	286.126
42	Prog aCTLA4 / Pre aPD1	NR	NR	434.398	19.7287	366.047	208.946
50	Prog aCTLA4 / Pre aPD1	NR	NR	972.477	8.72534	713.665	227.337
54	Prog aCTLA4 / Pre aPD1	NR	NR	295.511	3.54308	490.463	330.585
1	On aPD1	NR	NR	21.8759	10.0607	228.043	100.646
4	On aPD1	NR	NR	728.587	115.662	721.19	1255.18
19	On aPD1	NR	NR	26.6476	7.36286	273.189	81.3991
16	On aPD1	NR	NR	552.56	92.5435	782.172	6.57274
24	On aPD1	NR	R	110.646	0	91.6086	416.03
52	On aPD1	NR	R	1045.07	12.542	821.728	650.72
55	On aPD1	N/A	R	1961.19	54.407	834.411	2512.4
56	On aPD1	NR	R	1125.23	379.98	1487.52	639.964

## Sheet: Supplementary Table S4
Supplementary Table S4: Summary of immune profiling by IHC of additional CTLA-4 blockade-naïve samples
Pt ID	Timepoint	anti-CTLA-4 response	anti-PD-1 response	Biopsy Site	CD4	CD8	FoxP3	Gr-B	PD-1	PD-L1	LAG-3
					Density CT	Density CT	Density CT	Density CT	Density CT	H-Score	Density CT
61	Pre aPD1	N/A	R	Groin soft tissue	543.785	139.903	51.0463	43.1485	148.984	3.41816	507.293
63	Pre aPD1	N/A	R	Scalp	108.518	360.114	41.9127	79.1596	71.2802	72.8333
67	Pre aPD1	N/A	R	Lung	1780.33	861.362		243.79	322.064
60	Pre aPD1	N/A	R	Lung	1213.12	1659.61	100.614	635.15	1718.09	91.2981	966.774
59	Pre aPD1	N/A	R	Lung	713.139	2521.01			1511.7
58	Pre aPD1	N/A	NA	Shoulder	190.343	299.464
65	Pre aPD1	N/A	NR	Axillary LN	235.839	43.7463		25.4678	85.9519	10.4382
64	On aPD1	N/A	R	Liver	810.042	1193.16	431.761	327.177	368.082	30.1983	863.477
65	On aPD1	N/A	NR	Axillary LN	579.888	776.607	70.954	435.932	480.144	39.2925	631.482
68	On aPD1	N/A	NR	Parotid	604.01	820.237	198.939	328.132	480.971	99.5528

## Sheet: Supplementary Table S5
Supplementary Table S5. Nanostring Gene List
Gene Name	Accession Number
ABCF1	NM_001025091.1
ACO2	NM_001098.2
ACTB	NM_001101.2
ACVR1C	NM_145259.2
ACVR2A	NM_001616.3
ACVR2B	NM_001106.2
ADA	NM_000022.2
AIM2	NM_004833.1
ALAS1	NM_000688.4
ALCAM	NM_001627.3
AMICA1	NM_153206.2
AMIGO1	NM_020703.2
AMIGO2	NM_001143668.1
AMIGO3	NM_198722.2
ANGPT1	NM_001146.3
ANGPT2	NM_001118887.1
ANGPT4	NM_015985.2
AOC3	NM_003734.2
ARG1	NM_000045.2
ARG2	NM_001172.3
B2M	NM_004048.2
BATF3	NM_018664.2
BCAM	NM_005581.3
BCAN	NM_198427.1
BECN1	NM_003766.2
BGN	NM_001711.3
BID	NM_197966.1
BMPR1A	NM_004329.2
BMPR1B	NM_001203.1
BMPR2	NM_001204.5
BST2	NM_004335.2
C3	NM_000064.2
C5	NM_001735.2
CADM1	NM_014333.3
CADM2	NM_001167674.1
CADM3	NM_001127173.1
CADM4	NM_145296.1
CALR	NM_004343.2
CANX	NM_001024649.1
CARD11	NM_032415.2
CASP1	NM_033294.2
CASP3	NM_004346.3
CASP4	NM_001225.3
CCBP2	NM_001296.3
CCL1	NM_002981.1
CCL11	NM_002986.2
CCL13	NM_005408.2
CCL14	NM_032963.3
CCL15	NM_032965.4
CCL16	NM_004590.2
CCL17	NM_002987.2
CCL18	NM_002988.2
CCL19	NM_006274.2
CCL2	NM_002982.3
CCL20	NM_004591.2
CCL21	NM_002989.2
CCL22	NM_002990.3
CCL23	NM_145898.1
CCL24	NM_002991.2
CCL25	NM_005624.2
CCL26	NM_006072.4
CCL27	NM_006664.2
CCL28	NM_148672.2
CCL3	NM_002983.2
CCL4	NM_002984.2
CCL5	NM_002985.2
CCL7	NM_006273.2
CCL8	NM_005623.2
CCR1	NM_001295.2
CCR10	NM_016602.1
CCR2	NM_000647.3
CCR3	NM_001837.2
CCR4	NM_005508.4
CCR5	NM_000579.1
CCR6	NM_004367.5
CCR7	NM_001838.2
CCR8	NM_005201.2
CCRL1	NM_016557.2
CD109	NM_133493.3
CD14	NM_000591.2
CD19	NM_001770.4
CD1A	NM_001763.2
CD1B	NM_001764.2
CD1C	NM_001765.2
CD1D	NM_001766.3
CD1E	NM_001042583.1
CD200	NM_005944.5
CD200R1	NM_138939.2
CD209	NM_021155.3
CD22	NM_001771.2
CD244	NM_016382.2
CD247	NM_198053.1
CD274	NM_014143.2
CD28	NM_001243078.1
CD34	NM_001773.2
CD3D	NM_000732.4
CD3E	NM_000733.2
CD3G	NM_000073.2
CD4	NM_000616.4
CD40	NM_152854.2
CD40LG	NM_000074.2
CD44	NM_001001392.1
CD45R0	NM_080921.3
CD45RA	NM_002838.4
CD45RB	ENST00000367367.1
CD48	NM_001778.2
CD68	NM_001251.2
CD70	NM_001252.2
CD72	NM_001782.2
CD74	NM_001025159.1
CD79A	NM_021601.3
CD79B	NM_021602.2
CD80	NM_005191.3
CD81	NM_004356.3
CD86	NM_006889.3
CD8A	NM_001768.5
CD8B	NM_172099.2
CDH1	NM_004360.2
CDH2	NM_001792.3
CDH3	NM_001793.4
CEACAM1	NM_001712.3
CEACAM16	NM_001039213.2
CEACAM19	NM_001127893.1
CEACAM20	NM_001102597.1
CEACAM21	NM_001098506.1
CEACAM3	NM_001815.2
CEACAM4	NM_001817.2
CEACAM5	NM_004363.2
CEACAM6	NM_002483.4
CEACAM7	NM_006890.2
CEACAM8	NM_001816.3
CELA1	NM_001971.5
CERCAM	NM_016174.4
CERK	NM_182661.1
CHIT1	NM_003465.2
CHL1	NM_006614.2
CHUK	NM_001278.3
CIITA	NM_000246.3
CKLF	NM_001040138.1
CLEC4E	NM_014358.2
CLEC4M	NM_001144907.1
CLEC6A	NM_001007033.1
CLEC7A	NM_197954.2
CLTC	NM_004859.3
CMA1	NM_001836.2
COX5A	NM_004255.3
CR1	XM_005273064.1
CR2	NM_001877.3
CRADD	NM_003805.3
CRP	NM_000567.2
CSF1R	NM_005211.3
CSRP1	NM_004078.2
CTLA4	NM_005214.3
CTNNB1	NM_001098210.1
CTSB	NM_001908.3
CTSE	NM_001910.2
CTSG	NM_001911.2
CTSL1	NM_001912.4
CTSS	NM_004079.3
CTSV	NM_001333.3
CX3CL1	NM_002996.3
CX3CR1	NM_001337.3
CXCL1	NM_001511.1
CXCL10	NM_001565.3
CXCL11	NM_005409.3
CXCL12	NM_000609.5
CXCL13	NM_006419.2
CXCL14	NM_004887.4
CXCL16	NM_001100812.1
CXCL17	NM_198477.1
CXCL2	NM_002089.3
CXCL3	NM_002090.2
CXCL5	NM_002994.3
CXCL6	NM_002993.3
CXCL9	NM_002416.1
CXCR4	NM_001008540.1
CXCR6	NM_006564.1
CYBA	NM_000101.2
CYBB	NM_000397.3
CYCS	NM_018947.4
CYLD	NM_015247.1
CYR61	NM_001554.3
DAXX	NM_001350.3
DDR1	NM_001954.4
DDR2	NM_001014796.1
DDX17	NM_030881.3
DDX58	NM_014314.3
DDX60	NM_017631.5
DES	NM_001927.3
DHX58	NM_024119.2
DKK2	NM_014421.2
DLL4	NM_019074.3
DSCAM	NM_001389.3
DSTYK	NM_015375.1
Dusp5	NM_004419.3
Dusp6	NM_001946.2
ECD	NM_001135752.1
ECM1	NM_004425.3
ECM2	NM_001393.2
EDN1	NM_001168319.1
EDN2	NM_001956.3
EDN3	NM_000114.2
EED	NM_003797.2
EFEMP1	NM_004105.3
EFEMP2	NM_016938.3
EFNA1	NM_182685.1
EFNA2	NM_001405.3
EFNA3	NM_004952.4
EFNA4	NM_005227.2
EFNA5	NM_001962.2
EFNB1	NM_004429.4
EFNB2	NM_004093.2
EFNB3	NM_001406.3
EGR1	NM_001964.2
EMR1	NM_001974.3
EPHA1	NM_005232.3
EPHA10	NM_173641.2
EPHA2	NM_004431.2
EPHA3	NM_005233.5
EPHA4	NM_004438.3
EPHA5	NM_004439.4
EPHA6	NM_173655.2
EPHA7	NM_004440.2
EPHB1	NM_004441.3
EPHB2	NM_017449.2
EPHB3	NM_004443.3
EPHB4	NM_004444.4
EPHB6	NM_004445.3
ERAP1	NM_001040458.1
ERAP2	NM_022350.1
ESAM	NM_138961.2
Etv1	NM_004956.4
Etv4	NM_001079675.1
Etv5	NM_004454.2
F11R	NM_144503.1
F2R	NM_001992.2
F2RL1	NM_005242.3
FADD	NM_003824.2
FAM19A1	NM_213609.2
FAM19A2	NM_178539.3
FAM19A3	NM_182759.2
FAM19A4	NM_182522.3
FAM69B	NM_152421.3
FAP	NM_004460.2
FAS	NM_152874.1
FASLG	NM_000639.1
FCER1G	NM_004106.1
FCGR2B	NM_001002273.1
FCGR3A	NM_000569.6
FCGRT	NM_004107.3
FCN2	NM_015837.2
FGF10	NM_004465.1
FGF2	NM_002006.4
FGFR1	NM_023110.2
FGFR2	NM_000141.4
FGFR3	NM_000142.4
FGFR4	NM_002011.3
FGFRL1	NM_001004356.2
FLT1	NM_002019.4
FLT3	NM_004119.2
FLT4	NM_182925.4
FOXp3	NM_014009.3
FREM1	NM_144966.5
FREM2	NM_207361.4
FURIN	NM_002569.2
Fosl1	NM_005438.3
FoxO1	NM_002015.3
FoxO3	NM_001455.2
G6PD	NM_000402.3
GAPDH	NM_002046.3
GDF15-N	NM_004864.2
GDF15-C	NM_004864.2
GFI1	NM_001127216.1
GNLY	NM_012483.2
GPC1	NM_002081.2
GRAP2	NM_004810.2
GRN	NM_002087.2
GUSB	NM_000181.3
GXP1	NM_000581.2
GZMA	NM_006144.2
GZMB	NM_004131.4
GZMK	NM_002104.2
HAVCR2	NM_032782.3
HCK	NM_001172129.1
HEPACAM	NM_152722.4
HGF	NM_000601.4
HLA-A	NM_002116.6
HLA-B	NM_005514.6
HLA-C	NM_002117.4
HLA-DMA	NM_006120.3
HLA-DMB	NM_002118.3
HLA-DOA	NM_002119.3
HLA-DOB	NM_002120.3
HLA-DPA1	NM_033554.2
HLA-DPB1	NM_002121.4
HLA-DQA1	NM_002122.3
HLA-DQA2	NM_020056.3
HLA-DQB1	NM_002123.2
HLA-DRA	NM_019111.4
HLA-DRB1	NM_002124.1
HLA-E	NM_005516.4
HLA-F	NM_001098479.1
HLA-G	NM_002127.4
HLA-H	NR_001434.2
HPRT1	NM_000194.2
HSP90AA1	NM_005348.3
HSPA1A	NM_005345.5
ICAM1	NM_000201.1
ICAM2	NM_000873.3
ICAM3	NM_002162.3
ICAM4	NM_001544.3
ICAM5	NM_003259.3
ICOS	NM_012092.2
ICOSLG	NM_015259.4
IDH1	NM_005896.3
IDH3A	NM_005530.2
IDO1	NM_002164.3
IFI30	NM_006332.3
IFIH1	NM_022168.2
IFIT1	NM_001548.3
IFIT1L	NM_001010987.1
IFIT2	NM_001547.4
IFIT3	NM_001031683.2
IFITM1	NM_003641.3
IFNA1	NM_024013.1
IFNA10	NM_002171.1
IFNA14	NM_002172.2
IFNA16	NM_002173.2
IFNA2	NM_000605.3
IFNA21	NM_002175.2
IFNA5	NM_002169.1
IFNA6	NM_021002.1
IFNA7	NM_021057.2
IFNAR1	NM_000629.2
IFNAR2	NM_000874.3
IFNB1	NM_002176.2
IFNE	NM_176891.4
IFNG	NM_000619.2
IFNGR1	NM_000416.1
IFNGR2	NM_005534.3
IFNK	NM_020124.2
IFNW1	NM_002177.1
IGF1R	NM_000875.3
IGF2R	NM_000876.1
IKBKB	NM_001556.1
IKBKE	NM_014002.2
IKBKG	NM_001099857.1
IKZF1	NM_006060.3
IL10	NM_000572.2
IL10RA	NM_001558.2
IL10RB	NM_000628.3
IL11	NM_000641.2
IL11RA	NM_147162.1
IL12A	NM_000882.2
IL12B	NM_002187.2
IL12RB1	NM_005535.1
IL12RB2	NM_001559.2
IL13	NM_002188.2
IL13RA1	NM_001560.2
IL13RA2	NM_000640.2
IL15	NM_172174.1
IL15RA	NM_002189.2
IL16	NM_004513.4
IL17C	NM_013278.3
IL17D	NM_138284.1
IL17F	NM_052872.3
IL17RA	NM_014339.4
IL17RC	NM_153461.2
IL17RD	NM_017563.3
IL17RE	NM_153483.1
IL18	NM_001562.2
IL18BP	NM_001039659.1
IL18R1	NM_003855.2
IL18RAP	NM_003853.2
IL1A	NM_000575.3
IL1B	NM_000576.2
IL1F10	NM_032556.4
IL1F5	NM_012275.2
IL1F6	NM_014440.1
IL1F7	NM_014439.3
IL1F8	NM_014438.3
IL1F9	NM_019618.2
IL1R1	NM_000877.2
IL1R2	NM_173343.1
IL1RAP	NM_002182.2
IL1RL1	NM_016232.4
IL1RL2	NM_003854.2
IL1RN	NM_173841.1
IL2	NM_000586.3
IL20	NM_018724.3
IL20RA	NM_014432.2
IL20RB	NM_144717.2
IL21	NM_021803.2
IL21R	NM_181078.1
IL22	NM_020525.4
IL22RA1	NM_021258.2
IL23A	NM_016584.2
IL23R	NM_144701.2
IL24	NM_001185158.1
IL25	NM_022789.2
IL26	NM_018402.1
IL27	NM_145659.3
IL27RA	NM_004843.2
IL28A	NM_172138.1
IL28RA	NM_173065.1
IL29	NM_172140.1
IL2RA	NM_000417.1
IL2RB	NM_000878.2
IL2RG	NM_000206.1
IL3	NM_000588.3
IL31	NM_001014336.1
IL31RA	NM_139017.3
IL32	NM_001012633.1
IL33	NM_033439.2
IL34	NM_152456.1
IL3RA	NM_002183.2
IL4R	NM_000418.2
IL5	NM_000879.2
IL5RA	NM_000564.3
IL6	NM_000600.3
IL6R	NM_000565.2
IL6ST	NM_001190981.1
IL7	NM_000880.2
IL7R	NM_002185.2
IL8	NM_000584.2
IL8RA	NM_000634.2
IL8RB	NM_001168298.1
IL9	NM_000590.1
IL9R	NM_002186.2
INSR	NM_000208.1
IRAK1	NM_001569.3
IRAK3	NM_007199.1
IREB2	NM_004136.1
IRF1	NM_002198.1
IRF2	NM_002199.2
IRF3	NM_001571.5
IRF4	NM_001195286.1
IRF5	NM_002200.3
IRF6	NM_006147.2
IRF7	NM_004031.2
IRF8	NM_002163.2
IRF9	NM_006084.4
ITGAE	NM_002208.4
ITGAL	NM_002209.2
ITGAM	NM_000632.3
ITGAV	NM_002210.2
ITGAX	NM_000887.3
ITGB2	NM_000211.2
ITK	NM_005546.3
Ier3	NM_003897.2
JAM2	NM_021219.2
JAM3	NM_032801.3
KAL1	NM_000216.2
KDR	NM_002253.2
KIT	NM_000222.2
Klf4	NM_004235.4
L1CAM	NM_000425.3
LAG3	NM_002286.5
LBP	NM_004139.2
LCK	NM_005356.3
LCP2	NM_005565.3
LDHA	NM_001165414.1
LEP	NM_000230.2
LEPR	NM_001003679.1
LIFR	NM_001127671.1
LILRB3	NM_006864.2
LIMS1	NM_004987.3
LMBR1	NM_022458.3
LPA	NM_005577.2
LRP1	NM_002332.2
LRRK1	NM_024652.2
LRRK2	NM_198578.2
LTA	NM_001159740.1
LTBP1	NM_000627.3
LTBR	NM_002342.1
LUM	NM_002345.3
LY6G	XM_001475753.3
LY75	NM_002349.2
LY96	NM_015364.2
MADCAM1	NM_130761.1
MALT1	NM_006785.2
MAP3K14	NM_003954.1
MAP3K8	NM_005204.2
MARCO	NM_006770.3
MCAM	NM_006500.2
MET	NM_001127500.1
MICA	NM_000247.1
MICB	NM_005931.3
MIEF1	NM_019008.4
MIF	NM_002415.1
MITF	NM_000248.3
MLNR	NM_001507.1
MMD2	NM_198403.3
MMP1	NM_002421.2
MMP11	NM_005940.3
MMP12	NM_002426.3
MMP13	NM_002427.3
MMP14	NM_004995.2
MMP15	NM_002428.2
MMP19	NM_002429.4
MMP2	NM_001127891.1
MMP20	NM_004771.3
MMP21	NM_147191.1
MMP28	NM_001032278.1
MMP3	NM_002422.3
MMP7	NM_002423.3
MMP8	NM_002424.2
MMP9	NM_004994.2
MPL	NM_005373.2
MR1	NM_001531.2
MSR1	NM_138715.2
MUC4	NM_018406.4
MUC5AC	XM_003403450.1
MYD88	NM_001172567.1
Maff	NM_001161572.1
NAIP	NM_004536.2
NCAM1	NM_181351.3
NCAM2	NM_004540.2
NCAN	NM_004386.2
NCR1	NM_001242357.1
NDUFS3	NM_004551.1
NFAT5	NM_173214.1
NFATC1	NM_172387.1
NFATC2	NM_173091.2
NFATC3	NM_173164.1
NFATC4	NM_004554.4
NFKB1	NM_001165412.1
NFKBIA	NM_020529.1
NFKBIB	NM_002503.3
NFKBIE	NM_004556.2
NFKBIZ	NM_001005474.1
NFYA	NM_002505.3
NFYB	NM_006166.3
NFYC	NM_001142587.1
NKIRAS1	NM_020345.3
NKIRAS2	NM_001144927.1
NKRF	NM_001173488.1
NLRC3	NM_178844.2
NLRC4	NM_021209.3
NLRP1	NM_033004.2
NLRP10	NM_176821.3
NLRP12	NM_033297.2
NLRP13	NM_176810.2
NLRP2	NM_017852.1
NLRP3	NM_004895.4
NLRP4	NM_134444.4
NLRP6	NM_138329.1
NLRP7	NM_139176.3
NLRP8	NM_176811.2
NLRP9	NM_176820.2
NOD1	NM_006092.1
NOD2	NM_022162.1
NOS1	NM_000620.4
NOS2	NM_000625.4
NOTCH1	NM_017617.3
NOTCH2	NM_024408.3
NRCAM	NM_001037132.1
NRP1	NM_001024629.2
NRP2	NM_003872.2
OGDHL	NM_018245.2
OGFR	NM_007346.2
OLR1	NM_002543.3
P4HA1	NM_000917.3
P4HA2	NM_004199.2
P4HB	NM_000918.3
PDCD1	NM_005018.1
PDCD1LG2	NM_025239.3
PDGFRA	NM_006206.4
PDGFRB	NM_002609.3
PDIA2	NM_006849.2
PDIA3	NM_005313.4
PECAM1	NM_000442.3
PGK1	NM_000291.2
PGLYRP1	NM_005091.1
PGLYRP2	NM_052890.3
PGLYRP3	NM_052891.1
PGLYRP4	NM_020393.2
PLA2G2A	NM_000300.2
PLAU	NM_002658.3
PLAUR	NM_002659.2
PLOD1	NM_000302.2
PLOD2	NM_182943.2
PLOD3	NM_001084.4
POLR1B	NM_019014.4
POLR2A	NM_000937.4
PPARG	NM_015869.3
PPARGC1A	NM_013261.3
PPBP	NM_002704.2
PPIA	NM_021130.2
PRAJA1	NM_001032396.2
PRF1	NM_005041.3
PRKRIR	NM_004705.2
PROCR	NM_006404.3
PSMB10	NM_002801.2
PSMB8	NM_004159.4
PSMB9	NM_002800.4
PSME1	NM_006263.2
PSME2	NM_002818.2
PSME3	NM_005789.2
PTAFR	NM_000952.3
PTEN	NM_000314.4
PTGS2	NM_000963.1
PTK2	NM_005607.3
PTPRC	NM_080923.2
PTX3	NM_002852.3
PYCARD	NM_013258.3
PYDC1	NM_152901.2
RAC2	NM_002872.3
RARA	NM_001033603.1
RARB	NM_000965.3
RARG	NM_000966.3
RARRES3	NM_004585.3
RBP5	NM_031491.2
REG3G	NM_198448.2
RELA	NM_001145138.1
RELB	NM_006509.2
RFX5	NM_000449.3
ROBO1	NM_002941.2
ROBO2	NM_001128929.1
ROBO3	NM_022370.2
RPL19	NM_000981.3
RPLP0	NM_001002.3
RXFP1	NM_021634.2
Runx3	NM_001031680.2
S100A1	NM_006271.1
S100A10	NM_002966.1
S100A11	NM_005620.1
S100A12	NM_005621.1
S100A13	NM_001024210.1
S100A14	NM_020672.1
S100A2	NM_005978.3
S100A3	NM_002960.1
S100A5	NM_002962.1
S100A6	NM_014624.3
S100A7	NM_002963.2
S100A7A	NM_176823.3
S100A7L2	NM_001045479.1
S100A8	NM_002964.3
S100A9	NM_002965.2
S100B	NM_006272.1
S100P	NM_005980.2
S100Z	NM_130772.3
S1PR1	NM_001400.3
S1PR2	NM_004230.3
SAA1	NM_199161.1
SAA2	NM_030754.3
SDC1	NM_002997.4
SDC2	NM_002998.3
SDC3	NM_014654.3
SDC4	NM_002999.2
SDHA	NM_004168.2
SDK1	NM_001079653.1
SELL	NR_029467.1
SELPG	NM_003005.2
SEMA3A	NM_006080.1
SEMA3B	NM_001005914.1
SEMA3C	NM_006379.2
SEMA3D	NM_152754.2
SEMA3E	NM_012431.1
SEMA3F	NM_004186.3
SEMA3G	NM_020163.1
SEMA4A	NM_001193300.1
SEMA4B	NM_020210.3
SEMA4C	NM_017789.4
SEMA4D	NM_001142287.1
SEMA4F	NM_004263.3
SEMA4G	NM_001203244.1
SEMA5A	NM_003966.2
SEMA5B	NM_001031702.2
SEMA6A	NM_020796.3
SEMA6B	NM_032108.3
SEMA6C	NM_030913.4
SEMA6D	NM_153617.1
SEMA7A	NM_001146029.1
SHFM1	NM_006304.1
SIGLEC14	NM_001098612.1
SIX2	NM_016932.4
SKIV2L	NM_006929.4
SLAMF1	NM_003037.2
SLAMF6	NM_001184714.1
SLAMF7	NM_021181.3
SLIT1	NM_003061.2
SLIT2	NM_004787.1
SLPI	NM_003064.2
SMAD3	NM_005902.3
SMAGP	NM_001033873.1
SMURF2	NM_022739.3
SOCS1	NM_003745.1
SOCS3	NM_003955.3
SOD1	NM_000454.4
SORT1	NM_002959.4
SP1	NM_003109.1
SPI1	NM_001080547.1
SPN	NM_003123.3
SSTR1	NM_001049.2
SSTR2	NM_001050.2
STAT1	NM_007315.3
STAT3	NM_213662.1
SYK	NM_003177.5
Spry2	NM_005842.2
Spry4	NM_030964.3
TACR1	NM_015727.1
TANK	NM_004180.2
TAP1	NM_000593.5
TAP2	NM_000544.3
TAPBP	NM_003190.4
TAPBPL	NM_018009.4
TBP	NM_001172085.1
TCF4	NM_001083962.1
TCF7L2	NM_030756.3
TEC	NM_003215.1
TEK	NM_000459.2
TGFB1	NM_000660.4
TGFBR1	NM_001130916.1
TGFBR2	NM_003242.5
TGFBR3	NM_003243.3
THBS1	NM_003246.2
THRA	NM_199334.2
THRB	NM_000461.4
TICAM1	NM_014261.1
TICAM2	NM_021649.4
TIE1	NM_005424.2
TIMP1	NM_003254.2
TIMP2	NM_003255.4
TIMP3	NM_000362.4
TIMP4	NM_003256.2
TK2	NM_004614.3
TLR1	NM_003263.3
TLR10	NM_030956.2
TLR2	NM_003264.3
TLR3	NM_003265.2
TLR4	NM_138554.2
TLR5	NM_003268.3
TLR6	NM_006068.2
TLR7	NM_016562.3
TLR8	NM_016610.2
TLR9	NM_017442.2
TNF	NM_000594.2
TNFAIP3	NM_006290.2
TNFRSF10A	NM_003844.2
TNFRSF10B	NM_147187.1
TNFRSF10C	NM_003841.2
TNFRSF10D	NM_003840.3
TNFRSF11A	NM_003839.2
TNFRSF11B	NM_002546.3
TNFRSF12A	NM_016639.1
TNFRSF13B	NM_012452.2
TNFRSF13C	NM_052945.3
TNFRSF14	NM_003820.2
TNFRSF17	NM_001192.2
TNFRSF18	NM_148901.1
TNFRSF19	NM_018647.3
TNFRSF1A	NM_001065.3
TNFRSF1B	NM_001066.2
TNFRSF21	NM_014452.3
TNFRSF25	NM_148970.1
TNFRSF4	NM_003327.2
TNFRSF6B	NM_003823.2
TNFRSF8	NM_001243.3
TNFRSF9	NM_001561.4
TNFSF10	NR_033994.1
TNFSF11	NM_003701.2
TNFSF12	NM_003809.2
TNFSF13	NM_003808.2
TNFSF13B	NM_006573.4
TNFSF14	NM_003807.2
TNFSF15	NM_005118.2
TNFSF18	NM_005092.2
TNFSF4	NM_003326.2
TNFSF8	NM_001244.2
TNFSF9	NM_003811.3
TP53	NM_000546.2
TRAF3	NM_145725.2
TRIM22	NM_006074.4
TRIM27	NM_006510.4
TRIM46	NM_025058.3
TRIM5	NM_033093.1
TRIM69	NM_080745.3
TRPC4AP	NM_015638.2
TUBB	NM_178014.2
UBR1	NM_174916.2
UBXN1	NM_015853.3
ULBP1	NM_025218.2
ULBP2	NM_025217.2
VCAM1	NM_001078.3
VCAN	NM_004385.3
VEGFA	NM_001025366.1
VIM	NM_003380.3
VTN	NM_000638.3
WNT5A	NM_003392.3
XCL1	NM_002995.1
XCR1	NM_005283.2
Xbp1	NM_005080.2
ZAP70	NM_001079.3
ZC3HAV1	NM_020119.3

## Sheet: Supplementary Table S6a
Supplementary Table S6a. Nanostring summary 54 samples
Patient ID	Timepoint	anti-CTLA-4 response	anti-PD-1 response	Biopsy site	ACO2	ACTB	ACVR1C	ACVR2A	ACVR2B	ADA	AIM2	ALAS1	ALCAM	AMICA1	AMIGO1	AMIGO2	AMIGO3	ANGPT1	ANGPT2	ANGPT4	AOC3	ARG1	ARG2	B2M	BATF3	BCAM	BCAN	BECN1	BGN	BID	BMPR1A	BMPR1B	BMPR2	BST2	C3	C5	CADM1	CADM2	CADM3	CADM4	CALR	CANX	CARD11	CASP1	CASP3	CASP4	CCBP2	CCL1	CCL11
5	Pre-aCTLA4	R	N/A	Parotid	9.795	15.25	5.603	7.545	6.173	6.532	6.428	8.659	9.315	9.164	4.517	6.613	5.116	7.486	9.137	3.945	8.502	4.976	7.137	17.25	4.517	7.634	6.846	10.92	9.728	7.724	9.657	5.89	9.078	13.9	9.125	6.277	9.833	5.665	7.478	8.73	14.42	13.14	6.749	9.851	10.07	9.081	5.942	0.5587	4.517
7	Pre-aCTLA4	NR	R	Leg	10.35	15.72	8.303	9.168	6.846	8.254	6.058	9.32	9.629	9.896	2.113	8.135	0	9.741	8.09	0	12.2	10.76	3.698	16.74	2.961	9.616	3.878	11.14	10.38	8.602	10.42	7.456	10.49	12.78	11.32	5.857	8.395	5.722	8.912	7.456	13.78	13.05	5.406	10.44	9.815	10.07	8.205	3.25	4.546
8	Pre-aCTLA4	NR	R	Scalp	10.35	15.34	7.298	9.345	6.604	7.986	4.45	9.303	9.911	9.722	5.801	7.683	2.935	8.082	9.598	4.883	10.36	6.52	4.772	16.07	4.216	9.231	2.713	10.78	8.596	8.035	10.32	7.546	10.04	10.96	11.22	6.571	8.563	6.278	7.903	7.338	13.24	12.93	5.961	11.76	10.02	9.985	5.909	0.1281	3.713
9	Pre-aCTLA4	NR	R	Leg	9.471	15.18	4.851	8.11	6.632	6.805	5.568	8.81	8.523	8.994	3.266	6.469	3.693	7.54	7.399	2.315	8.409	7.444	3.362	15.91	3.9	7.953	5.506	10.01	9.305	7.754	9.162	3.9	9.472	10.54	10.16	5.97	7.048	4.339	7.56	7.306	12.9	13.1	5.149	8.478	9.884	8.554	6.073	2.495	4.136
10	Pre-aCTLA4	R	N/A	Axillary skin	10.28	15.19	5.177	9.563	5.886	6.277	4.692	8.956	9.468	9.98	3.287	6.494	3.107	7.727	9.047	0	7.462	11.92	5.082	16.11	3.107	8.079	6.142	10.99	9.606	8.116	9.78	6.457	10.56	11.65	10.28	6.36	8.581	4.154	6.777	7.216	13.62	12.81	5.858	11.13	10.5	10.19	6.601	4.485	2.007
18	Pre-aCTLA4	NR	NR	Groin skin	10.74	15.38	4.329	9.123	6.067	7.806	6.6	8.92	8.076	9.713	4.178	6.191	1.086	7.366	7.806	0	8.793	6.833	4.399	16.83	3.917	7.584	3.917	10.24	10.47	7.561	9.706	7	9.448	11.74	10.44	5.674	8.964	5.288	5.173	4.178	13.74	13.07	5.932	9.13	9.662	8.75	5.325	0.1682	5.932
19	Pre-aCTLA4	NR	NR	Axillary LN	9.424	14.04	6.177	7.137	7.226	6.66	8.672	8.66	7.612	8.089	4.648	5.29	3.284	9.415	6.085	2.846	5.662	2.846	2.968	16.47	4.365	5.817	0	10.98	7.794	7.64	9.79	7.712	10.43	13.99	7.021	5.218	9.346	4.068	5.061	5.716	14.19	11.57	6.623	10.63	10.07	9.733	3.082	2.563	3.544
22	Pre-aCTLA4	R	N/A	Axillary LN	11.02	15.36	5.578	7.771	7.848	5.578	6.43	8.241	9.459	8.083	5.649	8.957	4.046	8.772	7.412	5.059	5.781	3.819	8.444	15.93	2.172	6.72	0	10.2	8.096	8.383	9.464	7.392	10.03	10.38	8.78	6.304	11.89	4.242	5.254	8.229	12.4	12.51	6.117	7.818	10.31	8.297	3.819	2.172	4.708
23	Pre-aCTLA4	NR	NR	Foot	9.905	14.79	4.347	8.178	6.175	6.558	6.065	8.737	8.567	8.178	4.577	5.772	2.648	8.434	8.133	3.155	8.303	4.95	5.311	16.63	4.728	8.484	5.404	10.42	9.164	8.6	9.516	4.629	9.593	11.68	10.55	6.794	10.32	4.908	5.212	8.728	13.88	12.76	4.728	10.54	10.85	9.345	4.408	1.86	7.509
25	Pre-aCTLA4	NR	NR	Chest	9.974	15.67	4.454	8.41	6.177	7.476	7.486	8.916	9.053	10.42	4.923	7.29	2.908	7.075	11.88	0.5865	6.968	6.912	5.363	17.6	3.992	6.968	4.923	10.72	8.895	8.238	9.384	0.5865	10.03	14.59	10.06	6.314	10.33	4.979	6.644	7.29	13.46	12.99	7.138	11.73	9.983	10.89	5.665	1.965	4.373
31	Pre-aCTLA4	R	N/A	Lung	9.798	15.15	6.385	7.587	7.555	7.419	6.938	8.823	7.239	9.209	3.434	6.781	3.286	7.269	7.618	2.469	8.613	3.434	5.334	16.25	3.91	8.067	0	10.66	9.402	8.213	10.05	6.232	9.557	13.54	11.57	5.99	7.48	4.486	8.032	5.891	13.77	12.17	7.057	10.33	10.23	9.183	4.267	0.3988	4.845
37	Pre-aCTLA4	R	N/A	Foot	10.26	16.23	4.926	8.833	7.16	7.466	6.801	9.251	8.683	9.716	0.1713	9.464	0	9.422	8.916	0	10.08	11.71	6.194	16.37	0	9.288	8.01	11.09	12.34	8.395	10.31	8.264	10.58	11.93	7.466	5.216	8.395	5.301	7.484	7.183	13.96	13.4	6.829	9.548	10.23	10.48	6.679	0.1713	3.872
42	Pre-aCTLA4	NR	NR	Iliac LN	10.02	15.52	4.097	7.768	7.257	7.304	6.846	9.073	8.757	9.959	5.395	7.672	4.53	6.024	7.066	3.021	7.734	3.339	5.462	16.81	5.884	7.267	3.918	10.12	11.16	8.511	9.394	3.475	10.05	13.34	10.34	5.757	9.385	4.76	6.46	6.673	13.69	12	7.5	10.27	10.52	9.503	5.395	3.339	6.191
43	Pre-aCTLA4	NR	NR	Abd wall	10.27	15.22	7.155	8.338	6.461	8.03	3.496	8.517	7.259	7.817	3.566	9.454	3.697	7.061	8.596	2.985	9.637	3.979	4.38	14.43	5.577	8.12	10.07	9.502	10.71	7.863	8.99	5.168	9.092	11	10.23	5.453	6.947	4.455	6.144	6.921	13.1	12.98	4.596	7.523	9.179	7.957	5.318	1.78	5.318
47	Pre-aCTLA4	NR	R	Shoulder	9.806	15.7	5.566	8.797	7.212	7.759	7.383	9.068	9.211	9.963	3.094	7.135	1.957	7.641	8.032	1.22	9.371	7.906	3.094	16.43	3.542	8.131	0	11.18	10.99	8.72	10.1	8.817	10.5	11.72	11.55	6.078	7.916	5.19	6.835	6.322	14.25	12.51	5.939	9.059	10.16	9.157	6.505	0	6.481
50	Pre-aCTLA4	NR	NR	Inguinal LN	11.08	15.6	7.671	7.288	8.01	6.985	5.28	9.883	9.149	8.342	3.963	6.6	2.604	5.28	6.735	0	7.505	3.21	1.988	15.77	3.21	6.948	0	10.53	10.4	8.702	9.818	6.936	10.98	12.78	7.992	4.976	10.73	4.147	2.329	6.569	13.98	12.43	5.2	11.61	9.684	8.346	4.71	0	6.184
6	on aCTLA4	NR	R	Abdomen	10.08	14.83	4.871	7.803	5.241	6.879	6.367	8.679	10.01	8.93	0	6.209	3.994	6.4	7.714	1.387	7.887	10.03	3.994	16.04	4.303	7.283	0	9.93	8.17	8.244	9.01	7.695	10.27	13.21	10.22	6.991	8.665	4.232	6.597	5.204	13.6	12.92	5.346	10.33	10.22	9.447	5.346	0	2.683
18	on aCTLA4	NR	NR	Foot	12.05	16.64	0.2619	9.604	8.909	8.175	5.306	10.39	7.593	9.047	6.976	0.2619	0	7.593	6.976	0.2619	9.474	5.306	0	17.36	0	8.758	7.73	12.44	9.148	0	11.27	10.36	10.31	13.12	6.976	7.593	6.284	3.432	4.906	0	15.64	13.8	7.273	8.966	9.148	8.966	3.432	5.306	6.095
22	on aCTLA4	R	N/A	Axillary LN	10.92	15.6	5.388	8.165	6.303	6.485	9.65	9.044	10.31	8.661	1.798	9.441	0	8.628	7.271	0	6.463	3.336	6.97	17.59	5.028	6.123	0	10.23	8.708	8.792	8.453	6.067	9.81	13.03	11.98	5.56	9.835	5.639	5.56	6.506	13.39	12.73	6.721	9.973	10.93	9.557	0	0	5.519
27	on aCTLA4	R	N/A	Spleen	10.26	15.89	6.905	8.368	7.048	8.536	9.933	9.245	10.19	12.05	5.571	8.803	5.571	7.609	9.589	5.472	10.04	6.786	5.128	18.04	6.658	8.461	0	10.86	10.15	9.486	9.339	6.702	9.68	14.09	10.29	6.612	8.863	6.866	9.636	6.053	14.89	13.04	9.096	11.08	11.22	10.95	6.303	6.466	5.983
37	on aCTLA4	R	N/A	Lower extremity	10.16	15.54	5.478	8.884	6.744	7.077	8.454	8.722	10.85	11.42	3.73	8.418	0	6.961	7.839	4.457	8.454	4.939	4.854	17.76	5.234	6.648	4.066	10.52	10.38	9.456	8.722	6.461	9.15	12.67	8.847	4.939	8.698	6.721	3.008	5.994	13.9	13.29	7.817	10.48	10.71	10.59	0	6.544	5.994
2	Prog aCTLA4 / Pre aPD1	NR	NR	Neck	10.25	15.67	4.854	8.024	7.152	6.059	12.13	9.802	10.13	11.59	3.327	8.05	0	8.856	7.601	3.327	5.715	3.327	4.854	18.22	5.715	6.419	0	11.12	10.15	8.329	9.58	3.327	9.183	15.29	10.52	5.715	9.4	5.261	7.289	9.111	15.55	13.32	8.412	10.87	10.78	10.69	3.327	2.409	6.158
3	Prog aCTLA4 / Pre aPD1	NR	NR	Leg	9.856	15.73	5.885	8.473	8.216	7.118	7.534	8.686	9.304	10.16	5.166	8.7	0.1722	9.146	8.997	0.1722	9.185	4.603	5.001	17.02	5.313	7.363	0	10.72	11.54	8.588	9.898	5.166	9.834	12.73	10.67	5.058	8.228	6.143	5.166	8.953	14.49	12.84	7.091	9.504	10.2	9.892	6.269	4.749	7.386
4	Prog aCTLA4 / Pre aPD1	NR	NR	Chest	9.435	15.65	5.907	8.464	6.638	8.186	7.707	8.248	9.496	10.2	5.357	7.019	4.976	9.064	9.428	3.445	9.729	3.445	3.218	16.39	5.868	7.417	0	10.44	12.3	9.328	9.374	7.071	9.674	12.89	9.751	6.151	7.639	5.464	7.929	6.683	14.76	12.82	6.442	9.218	9.956	10.15	4.35	4.106	9.081
6	Prog aCTLA4 / Pre aPD1	NR	R	Back	10.39	15.79	7.467	7.305	6.116	7.031	7.587	8.999	8.517	8.59	4.827	8.67	1.472	8.434	8.741	4.181	11.53	4.181	2.164	17.07	4.54	9.522	0	10.22	9.771	8.016	9.635	7.722	10.57	15	9.205	6.993	6.763	5.506	7.453	4.642	14.22	13.31	4.738	10.83	9.91	10.08	5.885	0.09366	4.991
6	Prog aCTLA4 / Pre aPD1	NR	R	Back	10.34	14.98	6.95	6.003	5.521	5.845	6.075	8.854	7.924	6.553	0	2.633	0	4.012	6.578	2.186	7.026	0	5.572	16.73	2.633	4.792	0	9.916	7.262	7.735	8.473	7.569	10.75	15.18	5.76	6.765	6.553	3.681	3.481	0.3113	14.55	13.37	0.3113	11.19	10.11	10.01	0	0	0
8	Prog aCTLA4 / Pre aPD1	NR	R	Scalp	10.38	15.43	5.084	9.071	6.33	7.698	8.704	9.381	10.01	12.59	5.582	9.132	3.188	7.123	6.953	4.793	7.87	9.79	6.088	17.58	5.084	8.598	0	10.79	9.244	9.214	10.11	4.793	9.925	13.15	10.86	6.63	8.283	5.986	7.439	6.302	13.75	12.95	9.112	11.11	10.73	10.57	7.091	3.937	4.622
9	Prog aCTLA4 / Pre aPD1	NR	R	Leg	9.843	15.23	5.758	7.931	7.044	7.213	8.336	9.364	8.202	10.82	3.178	7.685	1.15	7.922	8.148	4.218	8.33	5.072	4.32	17.75	4.108	7.732	1.842	10.31	9.565	8.628	9.322	4.416	9.382	13	10.08	6.167	7.813	5.758	6.464	7.117	13.51	13.4	6.818	10.08	10.27	9.685	5.521	2.308	5.072
•15	Pre aPD1	N/A	R	Scalp	9.872	15.89	6.083	7.915	7.315	7.931	6.544	9.508	8.325	8.682	4.846	6.27	2.183	6.565	7.592	0	7.978	6.111	5.867	15.04	3.803	8.124	6.27	10.73	9.443	8.124	9.262	4.169	9.437	13.89	9.44	5.69	9.851	3.494	4.777	7.091	13.68	12.58	6.344	10.5	10.26	9.755	5.489	0	5.763
16	Prog aCTLA4 / Pre aPD1	NR	NR	Abdomen	10.51	15.48	8.276	7.658	7.919	7.721	8.955	9.048	7.02	7.569	2.494	3.968	0	6.388	8.234	0	6.792	6.611	6.998	15.78	4.142	5.236	6.566	10.04	8.439	8.15	9.037	7.117	10.92	14.15	7.913	4.891	7.148	3.77	2.73	7.075	13.72	12.62	4.737	11.15	10.16	8.779	3.872	0	6.299
18	Prog aCTLA4 / Pre aPD1	NR	NR	Leg	11.87	18.08	8.555	9.859	11.34	9.13	9.13	10.8	10.12	12.98	7.985	9.28	0	10.59	10.34	2.94	12.74	9.952	0	20.88	2.94	11.07	0	14.57	14.88	9.13	12.87	9.416	9.76	16.04	0	10.04	9.28	7.985	0	7.985	17.49	13.44	12.54	11.15	9.655	11.03	0	2.94	8.963
24	Prog aCTLA4 / Pre aPD1	NR	R	Arm	9.457	14.78	4.589	7.626	7.401	7.085	9.69	8.586	8.647	9.549	3.293	7.072	3.459	8.41	9.001	3.459	6.299	1.419	6.383	17.24	5.347	6.186	1.949	10.38	7.644	8.43	8.879	2.893	9.439	13.55	10.52	4.271	10.48	4.439	7.441	6.911	13.8	13.2	7.206	10.88	10.23	10.12	2.893	0	5.749
25	Prog aCTLA4 / Pre aPD1	NR	NR	Breast	10.25	14.89	4.5	7.629	5.845	6.118	1.92	8.199	7.633	6.697	4.605	4.795	0	6.697	11.36	0	6.51	0	5.313	14.96	3.062	7.288	8.715	10.21	9.979	7.36	9.225	3.486	9.495	12.37	8.936	5.507	10.08	3.692	4.128	5.628	12.67	13.44	3.247	8.207	10.01	9.501	1.684	0	4.347
49	Prog aCTLA4 / Pre aPD1	NR	NR	Brain	10.05	15.09	4.33	6.707	6.861	6.652	6.978	9.567	6.778	8.426	3.762	5.741	5.809	5.826	8.148	2.342	6.932	3.06	5.532	15.93	4.421	7.441	6.985	10.47	8.288	7.722	8.178	3.454	9.65	13.63	4.33	5.404	5.723	3.957	7.093	7.586	13.35	12.2	5.969	8.998	10.24	9.018	3.06	3.27	2.517
50	Prog aCTLA4 / Pre aPD1	NR	NR	Adrenal gland	10.9	15.88	8.617	8.054	7.892	7.374	8.561	12.12	9.42	10.63	6.011	9.085	4.41	8.118	6.338	3.435	9.037	1.747	4.843	17.48	4.305	8.022	0	10.68	10.38	8.882	9.957	5.943	10.23	14.24	11.52	6.465	9.667	5.235	6.284	7.165	13.87	12.81	7.534	11.35	10.31	9.493	6.256	0	6.99
52	Prog aCTLA4 / Pre aPD1	NR	R	Neck	7.237	14.38	8.682	7.828	9.837	3.741	12.01	10.08	9.975	12.38	4.84	10.95	4.84	11.63	10.1	5.457	9.355	6.911	0	18.64	6.219	6.715	0	11.7	14.21	8.317	11.96	9.421	10.94	15.47	9.421	7.083	5.457	8.627	3.741	7.828	15.91	11.09	12.09	9.63	11.22	10.86	6.488	3.741	7.237
54	Prog aCTLA4 / Pre aPD1	NR	NR	Brain	10.58	15.64	8.076	7.591	7.306	7.616	8.575	8.897	10.01	9.449	5.546	7.722	3.31	8.038	7.658	2.93	7.242	3.86	5.185	16.77	3.86	7.599	3.86	10.91	9.769	8.526	9.437	8.789	10.06	12.86	10.7	6.364	9.253	8.969	10.11	8.319	14.06	12.91	6.638	10.02	10.53	9.353	4.99	0	5.946
1	On aPD1	NR	NR	Abdomen	9.227	15	5.192	7.494	9.559	6.425	3.737	8.372	5.073	6.437	5.073	6.691	4.085	10.57	8.786	0	7.754	3.045	3.48	13.83	3.279	7.404	5.405	9.752	9.36	7.783	12.8	4.145	9.503	12.32	3.814	6.542	10.23	4.312	1.964	8.229	13.29	12.37	3.814	6.461	9.164	8.658	2.913	1.964	3.045
3	On aPD1	NR	R	Leg	10.9	17.27	7.115	9.328	6.968	7.903	9.372	10.02	9.811	11.74	5.24	9.551	0	9.43	8.763	2.07	10.83	7.371	4.607	17.75	4.607	8.891	0	11.38	13.59	8.493	9.821	8.02	10.79	13.94	13.3	6.407	8.951	6.804	7.248	7.311	15.57	13.69	8.52	10.93	9.485	10.92	8.093	5.24	9.687
4	On aPD1	NR	NR	Arm/shoulder	9.452	14.14	4.615	8.536	8.095	7.864	3.442	8.371	8.438	6.258	3.878	3.551	2.414	9.057	8.049	0	5.491	2.628	5.659	14.22	4.615	5.407	1.47	9.684	8.526	9.194	8.126	6.828	8.285	11.47	0	4.564	7.614	3.324	0	7.326	13.49	12.74	1.47	6.46	8.684	8.681	0	0.5772	3.196
7	On aPD1	NR	R	Leg	10.44	15.84	5.438	9.261	6.13	6.86	8.525	10.15	9.982	12.34	5.438	8.737	4.06	6.734	8.16	3.833	6.976	11.83	5.355	18.04	6.13	8.354	0	11.15	8.745	9.244	9.897	5.794	9.821	13.66	10.09	6.403	8.769	5.73	7.768	6.89	14.27	12.97	8.878	10.64	10.52	10.96	7.405	6.079	4.848
9	On aPD1	NR	R	Groin/leg	10.31	15.74	7.316	9.437	6.236	7.867	8.5	9.807	9.638	12.68	6.033	9.036	5.663	7.773	7.927	5.515	7.985	7.019	5.35	18.15	7.125	7.636	0	10.69	10.25	9.555	9.262	7.175	9.565	13.39	11.8	6.495	9.128	7.867	5.515	6.236	14.41	13.42	8.288	10.99	10.61	10.37	6.645	6.844	7.524
16	On aPD1	NR	NR	Chest wall	10.48	15.44	8.698	7.716	7.133	7.795	10.21	9.123	8.481	7.748	3.753	5.684	1.494	7.019	7.956	0	6.383	6.403	7.045	16.45	0	5.616	5.929	10.56	8.975	8.731	8.909	7.764	10.33	13.28	8.862	4.664	8.528	3.987	4.853	5.684	13.59	11.81	4.594	10.45	9.812	8.747	5.616	0	5.349
19	On aPD1	NR	NR	Chest	10.38	14.66	6.324	7.401	7.189	7.308	4.721	8.755	8.047	7.582	4.416	5.282	0.8137	7.086	7.294	1.707	7.138	6.542	3.734	15.11	3.734	7.189	2.53	10.23	8.774	7.484	8.395	7.184	10.77	12.21	8.723	5.062	9.046	4.029	4.115	5.966	13.62	12.51	4.029	7.773	9.663	8.473	4.995	2.864	3.734
24	On aPD1	NR	R	Arm	10.18	15.85	6.277	7.846	6.71	8.884	10.17	9.473	9.367	12.65	5.074	9.325	4.777	7.619	8.018	5.243	9.502	5.53	4.982	18.03	5.824	7.779	0	10.58	10.37	9.367	9.663	6.277	9.188	13.5	11.61	6.425	8.94	6.651	7.369	5.655	13.84	12.99	9.477	10.8	10.73	10.6	6.621	5.32	6.425
40	On aPD1	NR	NR	Post thorax	10.7	15.46	4.872	8.119	8.374	7.852	5.23	9.048	6.099	7.542	2.855	5.662	3.82	4.612	6.375	1.922	6.761	2.855	4.528	14.7	1.27	7.727	9.74	10.05	8.129	6.798	10.03	3.106	9.231	13.4	6.024	5.001	4.729	2.55	4.244	4.802	13.45	13.99	3.217	6.771	9.756	6.734	5.333	0	2.71
47	On aPD1	NR	R	Neck	10.13	15.85	7.138	7.27	7.352	7.85	10.88	9.854	9.05	11.75	3.897	9.302	0	8.497	7.748	5.04	10.14	5.535	4.937	18.47	6.058	7.808	0	11.3	9.923	8.729	9.899	7.733	9.782	13.65	11.56	6.324	9.281	6.283	6.441	6.106	14.08	12.65	8.881	11.09	10.96	10.62	4.1	4.579	6.802
2	Prog aPD1	NR	NR	Shoulder	10.71	14.57	5.314	7.737	6.692	6.783	7.441	8.843	8.098	8.375	4.662	5.953	0	7.149	9.334	2.591	6.857	4.287	5.51	17	4.137	6.566	5.205	9.978	7.999	8.503	8.284	5.812	8.911	13.89	8.818	4.716	7.11	5.314	4.486	6.927	13.86	13.29	3.439	9.041	10.06	8.896	4.214	4.214	5.447
19	Prog aPD1	NR	NR	Shoulder	10.26	14.39	5.081	6.867	6.321	6.462	4.223	8.547	7.509	7.311	3.924	5.433	1.223	7.509	6.755	0.2232	7.92	1.223	0	15.08	2.393	6.793	3.13	10.24	8.226	6.86	8.381	3.867	10.5	12.64	9.384	4.778	8.391	1.545	5.005	5.268	13.18	12.13	3.393	6.816	9.555	8.329	4.352	0	4.268
26	Prog aPD1	NR	NR	Thigh	11.03	15.67	2.016	7.705	8.043	7.188	7.671	10.43	8.173	6.618	0	8.984	3.543	5.026	5.817	0	6.218	2.321	3.286	16.75	3.42	5.521	9.217	10.05	7.13	6.547	9.34	0.2502	9.258	11.08	9.174	5.108	8.569	4.037	0	4.696	14.14	13.22	4.118	8.793	10.02	6.604	0	0	4.404
43	Prog aPD1	NR	NR	Abdomen	10.15	15.19	6.354	8.314	4.811	7.605	3.444	8.371	5.99	6.354	2.148	8.149	1.191	7.846	9.129	0.2739	8.07	0	4.435	13.96	4.696	7.749	9.759	9.264	10.49	8.294	9.09	6.373	9.208	10.91	6.778	5.357	6.913	4.202	5.534	6.75	13.36	12.33	4.572	6.061	9.146	7.427	5.862	0	4.284
45	Prog aPD1	NR	NR	Chest	10.39	15.22	7.181	8.257	7.664	7.703	8.828	9.583	8.888	9.38	4.318	9.38	1.782	7.89	8.238	2.919	8.376	4.104	6.579	16.81	5.188	6.579	0	10.72	9.618	8.555	9.213	6.826	10.19	13.82	11.78	4.504	8.507	5.61	6.06	7.731	14.94	12.97	5.835	10.47	10.78	10.69	5.437	3.547	9.179
49	Prog aPD1	NR	NR	Omentum	10.29	15.34	2.578	7.592	6.191	7.141	7.862	9.16	8.478	9.912	2.578	8.131	4.1	6.513	8.162	2.578	8.256	2.309	5.411	17.2	4.601	6.722	6.414	10.11	9.647	8.503	8.261	3.918	9.603	13.12	10.97	5.605	7.056	4.972	7.077	7.353	13.92	12.79	6.651	10.09	10.34	9.593	2.309	3.593	5.692
50	Prog aPD1	NR	NR	Flank	10.82	15.32	6.48	7.876	8.941	7.426	7.646	10.31	10.52	8.444	2.975	7.526	3.186	6.613	7.757	3.369	8.06	2.432	3.186	17.61	4.652	6.995	0	10.53	9.168	9.332	9.722	7.153	11.87	13.85	11.25	4.85	9.801	5.32	5.274	6.613	14.65	12.92	5.488	12.8	10.29	9.742	3.186	0	7.036
•= CTLA-4 blockade naïve patients
[truncated: 746 more columns]

## Sheet: Supplementary Table S6b
Supplementary Table S6b. Differentially upregulated and downregulated genes in pre-treatment anti-CTLA-4 samples
Gene	Fold Change	Unadjusted P-Value	FDR-Adjusted P-value
MPL	2.13551	0.00273429	0.998833
CCL26	1.35838	0.00523163	0.998833
SEMA4D	1.10989	0.00570688	0.998833
NLRP6	1.60449	0.00842273	0.998833
IL1A	1.83456	0.0120907	0.998833
TNFRSF10D	0.873309	0.01234	0.998833
ARG2	2.36575	0.0134	0.998833
CDH2	2.81749	0.0142024	0.998833
CCL3	-1.03371	0.0143283	0.998833
DAXX	0.279273	0.0207899	0.998833
CCR3	1.50329	0.0318729	0.998833
TNFRSF19	1.30824	0.0398757	0.998833
DDR1	0.774636	0.0404953	0.998833
MMP20	1.29192	0.0408108	0.998833
G6PD	0.671491	0.0408305	0.998833
ROBO1	0.782	0.0458866	0.998833
FAM19A2	1.14796	0.048675	0.998833
IL25	1.46636	0.0491294	0.998833
EFNB2	0.984091	0.0531032	0.998833
CCL15	1.10371	0.0533835	0.998833
SEMA3B	1.86387	0.0554909	0.998833
ULBP2	1.08945	0.0557008	0.998833
EFNA5	1.39905	0.0566831	0.998833
TNFRSF12A	1.35931	0.0567862	0.998833
FURIN	0.900927	0.0580725	0.998833
S100A12	2.56553	0.0665219	0.998833
SP1	0.370273	0.0669685	0.998833
FREM2	3.09185	0.0683459	0.998833
JAM3	1.1272	0.0738698	0.998833
IL27	-1.38356	0.0763479	0.998833
CYLD	0.427818	0.0774808	0.998833
RARB	1.4044	0.0781257	0.998833
GZMB	0.717418	0.079234	0.998833
CASP3	0.283727	0.0809935	0.998833
Dusp5	0.759309	0.0812464	0.998833
CARD11	0.688182	0.0813474	0.998833
CCL11	-1.27629	0.0833566	0.998833
MMP8	-2.29464	0.0861786	0.998833
CTSS	-0.574727	0.0912042	0.998833
UBR1	0.362582	0.0937585	0.998833
IL17RC	0.361691	0.0959655	0.998833
IL4R	0.636545	0.0960778	0.998833
NCR1	-0.386109	0.099188	0.998833
CCR6	1.17927	0.102096	0.998833
TLR9	0.714673	0.102397	0.998833
NCAM1	2.01606	0.102821	0.998833
ADA	-0.765873	0.103335	0.998833
JAM2	0.969127	0.104285	0.998833
FGFRL1	1.09509	0.10441	0.998833
NFKBIA	0.601636	0.107318	0.998833
TGFB1	0.521309	0.107818	0.998833
TRIM27	-0.435945	0.109912	0.998833
PPARG	-1.42482	0.110214	0.998833
NLRP12	-1.22495	0.110439	0.998833
TEK	1.42824	0.113728	0.998833
IDH3A	-0.373455	0.114447	0.998833
F11R	0.794855	0.115689	0.998833
CHUK	0.274927	0.115955	0.998833
IL8RB	1.35007	0.117816	0.998833
IL21R	0.738545	0.118005	0.998833
SDHA	-0.374291	0.120967	0.998833
IL10	0.894945	0.121307	0.998833
CXCL6	1.35469	0.121621	0.998833
RARA	-0.281491	0.121835	0.998833
MUC4	1.74964	0.122042	0.998833
IL1RAP	0.640745	0.12224	0.998833
NFKBIB	-0.713818	0.123543	0.998833
LEPR	0.8372	0.123867	0.998833
EFNA2	0.792964	0.125218	0.998833
PTGS2	0.935491	0.128153	0.998833
IKBKG	0.305036	0.12847	0.998833
WNT5A	1.18635	0.129325	0.998833
Runx3	-1.2728	0.134484	0.998833
BATF3	-1.46716	0.139869	0.998833
LTBP1	1.15511	0.144092	0.998833
NKIRAS2	0.482545	0.144938	0.998833
GAPDH	0.557818	0.145529	0.998833
EPHA10	0.964782	0.145829	0.998833
S100A6	0.767636	0.146136	0.998833
CXCL10	-1.32395	0.147331	0.998833
ICOSLG	0.513673	0.14965	0.998833
ICAM5	1.79273	0.155135	0.998833
Dusp6	0.740636	0.156561	0.998833
POLR1B	-0.395491	0.157686	0.998833
IFNE	2.08811	0.158182	0.998833
PPIA	-0.408836	0.159064	0.998833
CD28	0.565309	0.16109	0.998833
CD70	1.38842	0.161373	0.998833
Fosl1	1.17231	0.161703	0.998833
CEACAM16	0.629855	0.163853	0.998833
PGK1	0.32	0.164144	0.998833
CEACAM19	1.0062	0.16481	0.998833
SDC2	0.865091	0.165401	0.998833
TNFSF12	-0.366727	0.166584	0.998833
IFNA14	1.08555	0.167981	0.998833
TNFRSF6B	0.830127	0.168044	0.998833
ITGAV	0.443091	0.169284	0.998833
ITGAX	-0.498109	0.170276	0.998833
IL13RA2	1.72717	0.170471	0.998833
IL5	1.30187	0.171097	0.998833
SEMA4B	0.783164	0.175603	0.998833
IRF4	-1.48167	0.181043	0.998833
HAVCR2	-0.4044	0.184901	0.998833
MADCAM1	-0.308455	0.18499	0.998833
PTAFR	-0.4954	0.186201	0.998833
FGF10	0.853091	0.189662	0.998833
LY6G	-0.366636	0.189879	0.998833
RELA	0.2568	0.190142	0.998833
DES	-2.49538	0.193444	0.998833
CRP	0.594655	0.194188	0.998833
LDHA	0.366909	0.197122	0.998833
MR1	-0.577509	0.19741	0.998833
S100A10	0.434	0.197726	0.998833
COX5A	-0.302727	0.197904	0.998833
CHIT1	-1.53311	0.198682	0.998833
MITF	-0.946018	0.199718	0.998833
TNFRSF1A	0.2616	0.200175	0.998833
NLRP8	0.951236	0.204431	0.998833
HSP90AA1	-0.403636	0.206577	0.998833
IFIT2	0.441636	0.213776	0.998833
CTSL1	-0.666218	0.215571	0.998833
BMPR1B	1.09923	0.217963	0.998833
VEGFA	1.14778	0.218861	0.998833
NRCAM	1.64416	0.222134	0.998833
IL13RA1	0.380727	0.223416	0.998833
Xbp1	0.581127	0.223937	0.998833
OGFR	0.269982	0.22631	0.998833
MCAM	-0.775309	0.226911	0.998833
SEMA4F	0.800618	0.227957	0.998833
CEACAM1	-1.79415	0.230748	0.998833
IL27RA	0.491127	0.233734	0.998833
CD40LG	0.748055	0.237152	0.998833
NFYB	0.249164	0.237467	0.998833
CCL8	-0.877509	0.238748	0.998833
ICAM1	-0.444018	0.239557	0.998833
IKBKB	0.257527	0.240821	0.998833
IL7R	0.988036	0.241366	0.998833
IRF9	0.313727	0.242906	0.998833
CCL25	-1.19507	0.246363	0.998833
ICAM3	0.251836	0.247085	0.998833
IL20	0.703836	0.247116	0.998833
CRADD	0.453836	0.247144	0.998833
LIMS1	0.269618	0.248052	0.998833
TNFRSF4	-1.77902	0.248166	0.998833
PLOD2	0.495927	0.248615	0.998833
MIF	0.377455	0.249459	0.998833
S100A13	0.302545	0.252498	0.998833
P4HA2	0.808255	0.253724	0.998833
TLR6	0.680364	0.255669	0.998833
IFNA7	0.985242	0.255844	0.998833
Maff	0.793909	0.256126	0.998833
DKK2	-1.25095	0.257066	0.998833
SEMA3A	1.15751	0.257662	0.998833
FAM69B	-1.10604	0.257722	0.998833
TNFRSF14	-0.534782	0.260941	0.998833
CX3CL1	0.591164	0.262904	0.998833
LIFR	0.697927	0.264157	0.998833
DSCAM	0.752573	0.264231	0.998833
DDX60	0.480564	0.264443	0.998833
BECN1	0.260909	0.267091	0.998833
NFYC	0.170109	0.268358	0.998833
CD68	-0.565782	0.27189	0.998833
SLIT2	0.492655	0.272551	0.998833
IFNA5	0.647455	0.274383	0.998833
TIMP2	0.404727	0.274623	0.998833
NOS2	-0.776991	0.276089	0.998833
CCL16	0.568455	0.276914	0.998833
IL34	0.762491	0.277493	0.998833
IL7	0.603345	0.277502	0.998833
TRIM46	0.6104	0.278108	0.998833
TIMP3	0.977818	0.279699	0.998833
IL8RA	0.624782	0.280991	0.998833
IFNA6	-1.17398	0.281816	0.998833
CCL13	-0.723673	0.283472	0.998833
ALAS1	-0.232818	0.284431	0.998833
CADM3	0.802	0.284518	0.998833
MMP19	0.531255	0.28532	0.998833
IL12RB2	-1.77302	0.287387	0.998833
PTEN	0.433418	0.28746	0.998833
IKZF1	0.483182	0.288552	0.998833
FADD	0.272473	0.289726	0.998833
SLPI	2.48472	0.291032	0.998833
CADM4	0.677345	0.291404	0.998833
CD40	0.375127	0.292277	0.998833
HPRT1	0.403636	0.293646	0.998833
XCR1	0.5528	0.294239	0.998833
TIMP1	0.666182	0.295847	0.998833
CXCL11	-0.896218	0.296037	0.998833
S100A2	1.71684	0.298047	0.998833
S100A11	0.450364	0.300182	0.998833
DDX58	0.424782	0.304604	0.998833
IL11	1.6094	0.30768	0.998833
NRP1	0.518091	0.308774	0.998833
TGFBR2	0.291091	0.30957	0.998833
MYD88	0.246836	0.311308	0.998833
FGFR1	0.432055	0.311714	0.998833
CLTC	-0.817945	0.312605	0.998833
HLA.DRB1	-0.418	0.312635	0.998833
EFNB1	0.496836	0.313449	0.998833
IRF3	0.293364	0.31517	0.998833
CTNNB1	-0.405818	0.315323	0.998833
LILRB3	0.485509	0.315486	0.998833
RAC2	0.453345	0.317451	0.998833
Klf4	0.961727	0.317781	0.998833
SDC4	0.785182	0.318302	0.998833
TNFRSF13C	0.755745	0.318737	0.998833
MICB	0.264873	0.320475	0.998833
TLR4	-0.343018	0.321203	0.998833
DDX17	0.277273	0.328791	0.998833
THRA	-0.308836	0.329303	0.998833
NFATC2	0.344109	0.329851	0.998833
NLRP2	0.954709	0.332505	0.998833
EPHA2	0.813545	0.332989	0.998833
MMP28	1.20878	0.333536	0.998833
IDH1	-0.254964	0.334934	0.998833
NDUFS3	-0.155273	0.335464	0.998833
MSR1	-0.447	0.335794	0.998833
REG3G	-0.962464	0.336023	0.998833
PSME3	0.153636	0.336095	0.998833
IFNA10	1.07131	0.337686	0.998833
IKBKE	0.2756	0.339524	0.998833
S100A7L2	-0.0987273	0.340893	0.998833
UBXN1	0.272509	0.341937	0.998833
IL23R	-0.992382	0.343976	0.998833
LBP	-0.616564	0.347279	0.998833
MMP21	0.459182	0.347405	0.998833
TEC	0.617127	0.347799	0.998833
LRRK1	0.380127	0.347929	0.998833
EFNA1	0.399927	0.348824	0.998833
CDH3	-2.22651	0.349119	0.998833
ITK	0.735091	0.35054	0.998833
LTBR	0.273091	0.351604	0.998833
CX3CR1	0.465527	0.352521	0.998833
OGDHL	1.1498	0.355219	0.998833
NRP2	0.537455	0.355646	0.998833
SEMA6D	0.479145	0.356339	0.998833
NKRF	0.213582	0.359554	0.998833
S100A9	1.6298	0.361811	0.998833
FoxO3	0.370836	0.365432	0.998833
CERCAM	0.547582	0.367969	0.998833
CD8B	0.548255	0.373359	0.998833
ANGPT1	0.529836	0.374138	0.998833
Etv1	0.726145	0.376911	0.998833
CHL1	0.885782	0.377999	0.998833
RPL19	-0.492545	0.37802	0.998833
ITGAM	-0.297073	0.380198	0.998833
CCL4	-0.838055	0.383065	0.998833
TLR10	0.643618	0.384087	0.998833
TNFRSF17	0.857073	0.384579	0.998833
MAP3K14	0.255036	0.384691	0.998833
VIM	-0.571855	0.384853	0.998833
SELPG	0.730636	0.38757	0.998833
IL24	0.996073	0.388934	0.998833
SEMA6A	-1.24589	0.390335	0.998833
IL6ST	0.260727	0.394137	0.998833
MMP3	-1.25289	0.394778	0.998833
IFNGR2	0.182545	0.395853	0.998833
SEMA6C	0.457545	0.395861	0.998833
IFNAR1	0.271164	0.396337	0.998833
CXCL17	1.19342	0.396414	0.998833
IL17F	0.866018	0.399074	0.998833
Ier3	0.3828	0.401495	0.998833
NCAM2	0.575436	0.402553	0.998833
IL28RA	0.580164	0.403994	0.998833
IGF1R	0.224091	0.404112	0.998833
IL2RA	0.518564	0.404217	0.998833
SPI1	-0.307527	0.405066	0.998833
VCAM1	-0.814364	0.406713	0.998833
SAA1	-1.97398	0.408758	0.998833
S100A7A	1.34513	0.40967	0.998833
IL1F8	1.37177	0.411917	0.998833
CCR5	0.314327	0.413197	0.998833
STAT3	0.164182	0.415174	0.998833
IFNB1	0.716102	0.415413	0.998833
HLA.DRA	-0.300727	0.418276	0.998833
IFNAR2	0.190091	0.418524	0.998833
INSR	-0.298	0.418803	0.998833
CCL22	0.620909	0.419797	0.998833
CLEC4M	1.30898	0.421814	0.998833
SELL	0.708673	0.42236	0.998833
SMAD3	0.2172	0.424316	0.998833
NOD2	0.5218	0.424336	0.998833
CCR7	0.941309	0.424734	0.998833
IL21	0.541291	0.425418	0.998833
CTSG	-1.46185	0.426053	0.998833
CCL28	-0.770218	0.42718	0.998833
RELB	0.198109	0.427224	0.998833
IFNA2	0.692673	0.427655	0.998833
IL17RE	0.824782	0.427815	0.998833
S1PR2	0.202364	0.431266	0.998833
CXCR4	0.508855	0.433357	0.998833
LEP	-1.36638	0.433561	0.998833
SEMA6B	0.435727	0.435033	0.998833
FoxO1	0.302218	0.43508	0.998833
PLOD1	0.247509	0.436252	0.998833
MMD2	0.5247	0.438161	0.998833
TCF4	0.477764	0.438358	0.998833
IL17RA	0.185091	0.438474	0.998833
AMIGO2	0.598982	0.44097	0.998833
CCL27	-1.97935	0.443475	0.998833
TNFSF9	0.357727	0.44413	0.998833
BMPR1A	0.161291	0.444474	0.998833
ECM1	0.301236	0.446079	0.998833
KDR	1.0252	0.449358	0.998833
CD4	-0.230527	0.450487	0.998833
IL18BP	-0.361818	0.452169	0.998833
HLA.DQA2	-0.830713	0.452377	0.998833
IL32	0.683909	0.452805	0.998833
CD200R1	-1.06307	0.452984	0.998833
IRAK1	0.245364	0.453137	0.998833
IL9	-0.255536	0.454032	0.998833
SDC3	0.467182	0.454425	0.998833
IFNA1	-0.806036	0.456889	0.998833
C3	-0.636073	0.45851	0.998833
CXCL9	-0.962018	0.46175	0.998833
TNFRSF13B	-1.05867	0.464642	0.998833
CELA1	-0.858909	0.467132	0.998833
CCR1	-0.284109	0.46737	0.998833
SIGLEC14	0.641327	0.468514	0.998833
CD14	-0.328309	0.468912	0.998833
CEACAM7	-0.760082	0.469818	0.998833
CD44	0.193818	0.47042	0.998833
FCGRT	-0.312964	0.472932	0.998833
GDF15.C	-1.09324	0.473013	0.998833
IL1F6	0.950009	0.475196	0.998833
PDIA3	-0.154036	0.47793	0.998833
HLA.F	-0.4194	0.477932	0.998833
LUM	-1.03276	0.482507	0.998833
SMAGP	0.576491	0.483638	0.998833
IL26	0.517836	0.483843	0.998833
MMP9	-0.788618	0.484558	0.998833
GXP1	-0.216273	0.485597	0.998833
AMIGO1	-0.726885	0.487679	0.998833
TNFSF18	-0.528491	0.49195	0.998833
IL15RA	0.985582	0.493029	0.998833
EPHA3	0.517345	0.493213	0.998833
S100A5	0.800245	0.496154	0.998833
IFIT1	0.224073	0.49663	0.998833
CXCL13	-1.06147	0.497863	0.998833
S100A8	1.54644	0.499047	0.998833
HLA.C	0.301091	0.500747	0.998833
FCER1G	-0.221291	0.501877	0.998833
FOXp3	-0.333109	0.502943	0.998833
TRIM5	0.190982	0.503885	0.998833
SDK1	0.391127	0.504344	0.998833
CLEC4E	-0.847545	0.505368	0.998833
TNFRSF8	-0.283636	0.506007	0.998833
P4HB	0.225818	0.506567	0.998833
TAPBP	0.204909	0.508012	0.998833
PGLYRP2	0.743436	0.508803	0.998833
EDN3	-0.892545	0.509334	0.998833
CKLF	0.213855	0.510832	0.998833
TAPBPL	0.169382	0.515364	0.998833
IL8	0.605982	0.516184	0.998833
NLRP1	0.432018	0.51637	0.998833
ECD	0.234618	0.517533	0.998833
CCR10	0.661564	0.518334	0.998833
PTX3	0.586255	0.519926	0.998833
GRAP2	0.372164	0.522047	0.998833
STAT1	-0.376127	0.523523	0.998833
GPC1	0.737018	0.527418	0.998833
IL3	0.491978	0.529913	0.998833
TNFRSF25	-0.570049	0.531875	0.998833
LY75	0.348927	0.532106	0.998833
FGFR2	-0.997049	0.532473	0.998833
TNFSF15	-0.314436	0.533752	0.998833
SSTR1	-0.556427	0.534085	0.998833
CSRP1	0.254	0.534415	0.998833
PTPRC	0.243582	0.534512	0.998833
CD72	0.350436	0.535059	0.998833
LRRK2	0.245982	0.535109	0.998833
RFX5	-0.0976182	0.535235	0.998833
SHFM1	0.182545	0.535759	0.998833
NFATC3	0.161091	0.535966	0.998833
MMP2	-0.778564	0.53624	0.998833
TNFSF13	-0.183855	0.536352	0.998833
FASLG	0.3912	0.537853	0.998833
KIT	-1.47164	0.538124	0.998833
CXCL12	-0.791818	0.542167	0.998833
IFNW1	0.592736	0.54233	0.998833
IRF7	0.171691	0.543361	0.998833
EMR1	0.652327	0.545655	0.998833
TNFSF4	-0.253055	0.547395	0.998833
HLA.B	0.221091	0.550795	0.998833
FAS	-0.463418	0.550889	0.998833
SLIT1	0.262527	0.552805	0.998833
IREB2	0.125	0.554783	0.998833
ARG1	1.29007	0.555673	0.998833
MICA	0.191109	0.555992	0.998833
AOC3	-0.543491	0.556483	0.998833
SORT1	0.197091	0.557023	0.998833
ROBO2	0.691673	0.55725	0.998833
FGFR4	-0.431327	0.55738	0.998833
TNFRSF10C	-0.474436	0.557405	0.998833
CIITA	0.232527	0.55762	0.998833
IL1R1	0.388527	0.55995	0.998833
HLA.DMA	-0.231164	0.560581	0.998833
CCL18	-0.94	0.562343	0.998833
IL6R	-0.199564	0.566095	0.998833
CD109	0.332673	0.566196	0.998833
NOTCH1	0.226709	0.566414	0.998833
S100A1	-0.832491	0.567593	0.998833
IL2RB	0.256	0.568177	0.998833
ACTB	0.148727	0.569484	0.998833
ACVR1C	-0.306927	0.570468	0.998833
PDCD1LG2	-0.292564	0.577927	0.998833
TLR3	-0.192836	0.578504	0.998833
IL1F5	1.15652	0.57871	0.998833
LCP2	0.183382	0.583533	0.998833
HLA.H	0.520138	0.586128	0.998833
PPARGC1A	-0.411382	0.586692	0.998833
SOD1	-0.134891	0.586904	0.998833
CCL17	0.469582	0.588081	0.998833
C5	0.151036	0.590105	0.998833
THBS1	0.270545	0.590434	0.998833
S100A3	0.495836	0.590451	0.998833
SEMA5B	0.385455	0.590477	0.998833
CD209	0.2438	0.591998	0.998833
PSMB9	-0.201473	0.59253	0.998833
IL18	0.4158	0.594621	0.998833
IFI30	-0.233382	0.599393	0.998833
CCL20	-0.420909	0.599418	0.998833
IL10RB	-0.125727	0.59958	0.998833
CYCS	-0.162891	0.599769	0.998833
SMURF2	0.255491	0.601856	0.998833
EPHA4	0.369055	0.602838	0.998833
CEACAM20	0.524491	0.604662	0.998833
NLRP4	-0.351873	0.605106	0.998833
CASP1	-0.370964	0.605263	0.998833
HLA.DOA	-0.273709	0.605592	0.998833
CCR8	-0.594164	0.606886	0.998833
EPHA1	0.633164	0.609791	0.998833
IFNA21	-0.593145	0.611165	0.998833
EPHA6	0.442164	0.611849	0.998833
IL1F9	0.7812	0.61191	0.998833
SYK	0.243236	0.6133	0.998833
MALT1	0.175782	0.613539	0.998833
S1PR1	0.289618	0.613573	0.998833
HEPACAM	-0.712509	0.616511	0.998833
GDF15.N	-0.582509	0.616631	0.998833
SLAMF1	-0.5068	0.617251	0.998833
IL1RL2	0.412536	0.618339	0.998833
HLA.DMB	-0.137873	0.620164	0.998833
THRB	0.438382	0.620382	0.998833
EDN1	0.401927	0.6246	0.998833
EED	0.105436	0.626427	0.998833
TRAF3	0.193091	0.626762	0.998833
EGR1	0.354091	0.626942	0.998833
CANX	0.134182	0.627196	0.998833
GRN	0.177273	0.627933	0.998833
ANGPT2	0.296909	0.629687	0.998833
SEMA3E	-0.634945	0.630061	0.998833
TGFBR1	0.145091	0.630336	0.998833
TICAM2	0.219891	0.633088	0.998833
NLRP10	0.763036	0.633322	0.998833
MMP1	-0.941782	0.63458	0.998833
CD74	-0.177091	0.635306	0.998833
IL1B	0.250364	0.635866	0.998833
PDCD1	0.644909	0.635956	0.998833
RXFP1	0.434764	0.638222	0.998833
TP53	0.138345	0.638293	0.998833
CTSE	0.283018	0.64081	0.998833
DDR2	0.195527	0.641061	0.998833
CD81	-0.114545	0.641632	0.998833
IL29	-0.381891	0.642032	0.998833
CR2	0.729709	0.642369	0.998833
IFIT1L	0.338364	0.64587	0.998833
GZMK	-0.777382	0.647049	0.998833
CD274	-0.186291	0.64828	0.998833
CDH1	-0.960218	0.648872	0.998833
PSMB10	-0.228327	0.649897	0.998833
IL31	-0.354255	0.650053	0.998833
TNFRSF9	-0.545927	0.65017	0.998833
HSPA1A	-0.278145	0.650291	0.998833
CD45R0	0.115727	0.650937	0.998833
CYBA	-0.187764	0.65191	0.998833
NCAN	-0.297373	0.652684	0.998833
AMIGO3	0.443545	0.653505	0.998833
CEACAM21	-0.351236	0.653617	0.998833
HLA.DPB1	0.456	0.657146	0.998833
MUC5AC	-0.354736	0.659268	0.998833
NFAT5	0.113382	0.659298	0.998833
EPHA5	-0.640055	0.659797	0.998833
KAL1	0.364964	0.659925	0.998833
IRF2	0.0929818	0.660542	0.998833
FCN2	0.502118	0.66174	0.998833
EFEMP1	-0.448036	0.66226	0.998833
MAP3K8	0.175691	0.662529	0.998833
MMP13	0.600218	0.662722	0.998833
IL12RB1	-0.493709	0.665972	0.998833
CXCL16	-0.101909	0.666572	0.998833
CD79B	0.4638	0.668534	0.998833
SEMA5A	-0.359945	0.668571	0.998833
SEMA3C	0.136982	0.668674	0.998833
TIE1	0.255691	0.670297	0.998833
IL12B	0.426073	0.670738	0.998833
SLAMF7	-0.627218	0.671033	0.998833
IL17RD	-0.203709	0.673977	0.998833
LPA	0.314055	0.675305	0.998833
PGLYRP3	0.750018	0.677105	0.998833
PGLYRP4	0.600291	0.677782	0.998833
Etv4	0.439309	0.678425	0.998833
PLOD3	-0.130909	0.678659	0.998833
SEMA4C	-0.158891	0.679323	0.998833
RARG	0.256855	0.679431	0.998833
HGF	0.187127	0.679482	0.998833
PYDC1	0.643855	0.680372	0.998833
RARRES3	-0.232782	0.680453	0.998833
IL16	-0.232545	0.681135	0.998833
DLL4	0.237727	0.683001	0.998833
TRIM69	-0.314636	0.683157	0.998833
TLR8	0.151836	0.686224	0.998833
IL1F7	-0.974382	0.686696	0.998833
TRIM22	0.217473	0.688059	0.998833
CADM2	-0.151673	0.688542	0.998833
CD80	0.190891	0.689374	0.998833
EPHA7	0.471673	0.689941	0.998833
TLR1	-0.194436	0.690746	0.998833
FCGR2B	-0.182436	0.691322	0.998833
CD1D	-0.515145	0.692075	0.998833
CD1B	-0.441491	0.69212	0.998833
IL11RA	0.234455	0.693721	0.998833
XCL1	0.197091	0.694468	0.998833
CTSV	-0.583691	0.694475	0.998833
NOS1	0.674191	0.695293	0.998833
CD86	0.108836	0.696383	0.998833
TLR5	-0.117964	0.69751	0.998833
NLRP13	0.328591	0.69775	0.998833
TNFRSF18	0.273855	0.698149	0.998833
IL5RA	-0.321509	0.698915	0.998833
NFKBIZ	0.196782	0.699414	0.998833
SOCS1	0.180982	0.701106	0.998833
Spry2	0.253018	0.701336	0.998833
FGFR3	-0.705255	0.702711	0.998833
CMA1	-0.737909	0.703965	0.998833
OLR1	-0.404364	0.705283	0.998833
CXCL14	0.544545	0.707227	0.998833
MMP7	0.535382	0.708019	0.998833
IL31RA	-0.229927	0.70941	0.998833
IL18R1	0.158836	0.709575	0.998833
ACO2	0.104236	0.70999	0.998833
CADM1	0.3318	0.7109	0.998833
PROCR	0.167382	0.711112	0.998833
MIEF1	0.148527	0.711268	0.998833
SEMA4G	-0.387945	0.711453	0.998833
IL1R2	0.363055	0.714029	0.998833
TNFAIP3	0.160855	0.714537	0.998833
VTN	0.275964	0.715914	0.998833
MMP14	0.117	0.716367	0.998833
LAG3	-0.527527	0.717891	0.998833
NFATC4	-0.257255	0.721605	0.998833
HLA.DQA1	-1.17771	0.724681	0.998833
CYR61	0.259364	0.726254	0.998833
TNFSF13B	0.1712	0.727647	0.998833
CCL24	-0.476473	0.72782	0.998833
CEACAM5	0.439073	0.729825	0.998833
MLNR	-0.383127	0.73059	0.998833
CYBB	-0.137291	0.730721	0.998833
IL15	0.116927	0.731411	0.998833
TICAM1	0.119509	0.73217	0.998833
IFNK	0.401691	0.733586	0.998833
ECM2	-0.377709	0.733923	0.998833
FLT1	0.125673	0.736238	0.998833
EDN2	0.271473	0.739269	0.998833
CXCR6	-0.279073	0.743955	0.998833
ERAP2	0.304091	0.744497	0.998833
CR1	0.221073	0.746415	0.998833
ANGPT4	0.384464	0.746742	0.998833
CCL7	0.127691	0.747428	0.998833
MET	-0.353091	0.751916	0.998833
TNFRSF1B	0.117364	0.753186	0.998833
IL13	0.228109	0.755505	0.998833
ACVR2B	0.136491	0.758579	0.998833
CCL23	0.255531	0.760073	0.998833
TNFSF11	-0.1702	0.760939	0.998833
ITGAE	-0.0781273	0.761163	0.998833
LCK	0.267236	0.761993	0.998833
IL2	-0.308473	0.764355	0.998833
CASP4	0.147109	0.764619	0.998833
CEACAM3	0.173045	0.766515	0.998833
CD1C	-0.340173	0.766668	0.998833
FAP	-0.243636	0.772782	0.998833
CCL19	-0.484455	0.773194	0.998833
ICOS	-0.208873	0.778272	0.998833
FLT3	-0.375545	0.781716	0.998833
CSF1R	0.0965091	0.783296	0.998833
SOCS3	0.143018	0.783348	0.998833
PTK2	0.0498182	0.783905	0.998833
IL6	0.240109	0.786194	0.998833
PGLYRP1	-0.167024	0.789779	0.998833
HLA.DPA1	-0.0970909	0.791558	0.998833
DHX58	0.087	0.791646	0.998833
SLAMF6	0.326964	0.792068	0.998833
BCAN	0.533327	0.79449	0.998833
EFNB3	-0.198818	0.79694	0.998833
TCF7L2	0.100909	0.797416	0.998833
LRP1	-0.124545	0.798803	0.998833
ALCAM	0.128527	0.800672	0.998833
ICAM4	-0.102327	0.800703	0.998833
EPHB3	-0.268164	0.802761	0.998833
IL1RL1	-0.361709	0.804837	0.998833
VCAN	-0.215873	0.804901	0.998833
NOTCH2	0.0581818	0.805318	0.998833
TK2	0.0671818	0.805826	0.998833
CCR4	-0.328964	0.80678	0.998833
CD19	0.375793	0.809546	0.998833
CD3G	0.257709	0.809857	0.998833
HLA.DOB	-0.201655	0.812241	0.998833
TNFSF10	-0.193236	0.812293	0.998833
BCAM	0.1286	0.81278	0.998833
MARCO	0.205564	0.814978	0.998833
F2R	0.145309	0.815348	0.998833
HLA.E	0.0947273	0.816342	0.998833
P4HA1	-0.0613455	0.819217	0.998833
S100P	0.325927	0.820131	0.998833
PDGFRA	-0.193564	0.820629	0.998833
CD3E	0.230782	0.820649	0.998833
PLAU	-0.139018	0.821576	0.998833
TIMP4	0.274345	0.823923	0.998833
CD34	-0.2108	0.824277	0.998833
ICAM2	-0.183036	0.824361	0.998833
PLA2G2A	-0.290345	0.825262	0.998833
IL12A	-0.2398	0.825935	0.998833
IL28A	0.164264	0.826361	0.998833
IDO1	-0.190291	0.827136	0.998833
GNLY	0.1556	0.828606	0.998833
LTA	-0.179891	0.829514	0.998833
PECAM1	0.151491	0.830745	0.998833
CCR2	-0.152236	0.832746	0.998833
CEACAM6	-0.318909	0.834337	0.998833
NAIP	0.0646	0.835023	0.998833
EFNA4	0.0994364	0.835505	0.998833
CXCL1	-0.188073	0.836236	0.998833
TNFSF14	-0.226782	0.837797	0.998833
IL22RA1	0.224636	0.838609	0.998833
IFNGR1	0.0954545	0.840234	0.998833
CLEC6A	0.122702	0.844757	0.998833
CD247	0.180782	0.845892	0.998833
BID	-0.0361636	0.845897	0.998833
TLR2	-0.117891	0.846866	0.998833
EFEMP2	0.114345	0.8499	0.998833
CTSB	-0.0685455	0.850378	0.998833
IFIT3	0.0726545	0.853431	0.998833
CCL5	-0.215164	0.854298	0.998833
TNFRSF10A	0.145218	0.854431	0.998833
FCGR3A	-0.151673	0.855702	0.998833
FGF2	0.185891	0.856311	0.998833
IL2RG	-0.165582	0.857353	0.998833
TLR7	-0.0602364	0.858462	0.998833
IL1F10	0.275109	0.858656	0.998833
IFNA16	-0.156385	0.864195	0.998833
IL33	0.122127	0.866015	0.998833
CD200	-0.106709	0.869923	0.998833
PRAJA1	0.0506182	0.871346	0.998833
NFATC1	-0.0717091	0.871366	0.998833
SPN	0.136509	0.874133	0.998833
ERAP1	-0.0554	0.875137	0.998833
IGF2R	-0.0450909	0.875629	0.998833
PYCARD	0.134982	0.876199	0.998833
IRAK3	0.0669273	0.876763	0.998833
EPHB2	0.121909	0.878227	0.998833
ACVR2A	-0.0731091	0.878393	0.998833
HLA.DQB1	-0.0807273	0.878409	0.998833
IRF6	-0.311418	0.879357	0.998833
FREM1	0.187636	0.879633	0.998833
HLA.A	-0.0625455	0.879853	0.998833
TNFSF8	0.0918364	0.884405	0.998833
CEACAM4	0.174964	0.88479	0.998833
BMPR2	-0.0503636	0.885526	0.998833
TNFRSF10B	0.0570909	0.888608	0.998833
AIM2	0.0847091	0.889698	0.998833
B2M	0.0465455	0.891684	0.998833
IL10RA	0.0549273	0.891701	0.998833
PDIA2	-0.138582	0.89174	0.998833
S100B	0.154309	0.892955	0.998833
CTLA4	-0.0879455	0.893943	0.998833
TANK	0.0439273	0.894026	0.998833
PRF1	0.0994182	0.89686	0.998833
NFKB1	0.0313091	0.896875	0.998833
CXCL3	0.0578	0.900115	0.998833
NLRP3	-0.0510364	0.902052	0.998833
SDC1	0.178364	0.904395	0.998833
RPLP0	0.0549091	0.905221	0.998833
MMP11	-0.251291	0.905913	0.998833
NFKBIE	0.0489818	0.906032	0.998833
CD45RB	-0.0832	0.909611	0.998833
MMP15	0.0946545	0.910248	0.998833
CXCL2	-0.0680364	0.910961	0.998833
IFITM1	-0.106582	0.913497	0.998833
S100A7	0.299945	0.9151	0.998833
EPHB1	0.154618	0.915151	0.998833
S100Z	-0.107073	0.917118	0.998833
EPHB6	0.160164	0.918212	0.998833
F2RL1	-0.170713	0.918366	0.998833
IL1RN	0.117727	0.919616	0.998833
NLRC3	-0.136745	0.920967	0.998833
IL17D	0.0843273	0.921207	0.998833
TNF	0.0674364	0.921532	0.998833
L1CAM	-0.107982	0.922578	0.998833
S100A14	0.235345	0.92261	0.998833
ESAM	-0.0856727	0.923424	0.998833
TACR1	-0.0356545	0.923459	0.998833
EFNA3	0.112055	0.923611	0.998833
PDGFRB	-0.0744727	0.925306	0.998833
SAA2	-0.167927	0.926319	0.998833
NLRP7	-0.0928545	0.926589	0.998833
AMICA1	0.0401273	0.927418	0.998833
GZMA	0.0756182	0.927564	0.998833
IL3RA	-0.0678	0.927797	0.998833
DSTYK	-0.0387818	0.928887	0.998833
Etv5	0.0590727	0.929758	0.998833
PSME1	0.0205455	0.930781	0.998833
CD79A	0.177673	0.931184	0.998833
SIX2	-0.105636	0.93185	0.998833
CCL21	0.199055	0.93227	0.998833
CCRL1	0.0838	0.93414	0.998833
TAP1	0.0440364	0.934446	0.998833
CD45RA	-0.141709	0.935337	0.998833
IL22	-0.0638255	0.936982	0.998833
PRKRIR	0.0137091	0.937537	0.998833
IL18RAP	-0.0541818	0.940385	0.998833
ULBP1	-0.0780491	0.940722	0.998833
TAP2	0.0387455	0.941008	0.998833
NFYA	0.0224182	0.941209	0.998833
LY96	0.0282	0.941212	0.998833
TGFBR3	0.0475273	0.941802	0.998833
CEACAM8	0.0727273	0.943328	0.998833
TNFRSF11A	0.0715636	0.948596	0.998833
CCBP2	-0.0470364	0.949076	0.998833
TNFRSF11B	0.0316545	0.949652	0.998833
IL9R	-0.0537855	0.95088	0.998833
IL20RB	-0.120527	0.951095	0.998833
CLEC7A	0.0259455	0.951204	0.998833
ITGAL	0.0472909	0.951385	0.998833
POLR2A	-0.0214909	0.952421	0.998833
TNFRSF21	-0.0462	0.953131	0.998833
IL20RA	0.0936691	0.95326	0.998833
EPHB4	0.0277455	0.954424	0.998833
CALR	-0.0214545	0.954851	0.998833
IL17C	0.0256182	0.955241	0.998833
GFI1	-0.0297818	0.957063	0.998833
MMP12	-0.0693273	0.958107	0.998833
CXCL5	-0.0707655	0.959078	0.998833
TRPC4AP	0.0106909	0.95952	0.998833
IL23A	-0.05174	0.960196	0.998833
CCL2	0.0196182	0.961852	0.998833
PSMB8	0.0181818	0.965859	0.998833
SKIV2L	0.0124364	0.965873	0.998833
FAM19A4	0.0461	0.966123	0.998833
SEMA7A	-0.0236545	0.966144	0.998833
CD244	-0.0515455	0.966563	0.998833
CCL1	-0.03814	0.967688	0.998833
Spry4	0.0312545	0.96792	0.998833
NLRC4	0.0157091	0.968117	0.998833
PPBP	-0.0381727	0.968513	0.998833
CD8A	0.0434727	0.968869	0.998833
CD48	-0.0357636	0.969983	0.998833
SSTR2	-0.0378182	0.97141	0.998833
BGN	0.0285818	0.971494	0.998833
FLT4	0.0314909	0.972621	0.998833
HLA.G	0.0212909	0.973974	0.998833
IRF5	0.01	0.974137	0.998833
IRF1	-0.0166545	0.974196	0.998833
FAM19A3	-0.0376491	0.974338	0.998833
ROBO3	0.0104727	0.974603	0.998833
CCL14	0.0677818	0.97469	0.998833
ITGB2	-0.0106	0.975237	0.998833
SEMA3G	0.0173091	0.976185	0.998833
SEMA4A	-0.0199455	0.977982	0.998833
NOD1	-0.00885455	0.978471	0.998833
PSME2	0.00654545	0.982374	0.998833
RBP5	0.0215091	0.984691	0.998833
IFNG	-0.00892727	0.986168	0.998833
IFIH1	-0.00529091	0.986834	0.998833
CERK	0.00661818	0.987098	0.998833
LMBR1	-0.00429091	0.990143	0.998833
HCK	0.00441818	0.990263	0.998833
SEMA3D	0.0105091	0.990364	0.998833
CD3D	-0.0116545	0.991299	0.998833
CD22	-0.00892727	0.992216	0.998833
NKIRAS1	0.00254545	0.992542	0.998833
BST2	-0.00363636	0.996301	0.998833
PLAUR	-0.00214545	0.996678	0.998833
CD1A	-0.00450909	0.99695	0.998833
CD1E	-0.00214545	0.996978	0.998833
IRF8	0.00143636	0.997479	0.998833
NLRP9	-0.00340364	0.997697	0.998833
SEMA3F	0.00158182	0.998833	0.998833
FAM19A1	0	NA	NA

[truncated: 11 more sheets: Supplementary Table S6c, Supplementary Table S6d, Supplementary Table S6e, Supplementary Table S7, Supplementary Table S8, Supplementary Table S9a, Supplementary Table 9b, Supplementary Table S9c, Supplementary Table S10, Supplementary Table S11a, Supplementary Table S11b]
